# 1        **A quantitative and spatial analysis of cell cycle regulators during the fission yeast cycle**

2

3        Scott Curran<sup>1</sup>, Gautam Dey<sup>2,6</sup>, Paul Rees<sup>3,4</sup> & Paul Nurse<sup>1,5\*</sup>

4

5        <sup>1</sup> Cell Cycle Laboratory, The Francis Crick Institute, London. UK

6        <sup>2</sup> MRC Laboratory for Molecular Cell Biology, London, UK

7        <sup>3</sup> College of Engineering, Swansea University, Swansea, UK

8        <sup>4</sup> Imaging Platform Broad Institute of Harvard and MIT, Cambridge, MA, USA

9        <sup>5</sup> Laboratory of Yeast Genetics and Cell Biology, Rockefeller University, New York, NY, USA

10       <sup>6</sup> Current address: Cell Biology and Biophysics, European Molecular Biology Laboratory,

11       Meyerhofst. 1, 69117 Heidelberg, Germany

12       \* Correspondence: [paul.nurse@crick.ac.uk](mailto:paul.nurse@crick.ac.uk)

13

## 14       **Significance Statement**

15       Across eukaryotes the increasing level of cyclin dependent kinase (CDK) activity drives  
16       progression through the cell cycle. As most cells divide at specific sizes, information responding to  
17       the size of the cell must feed into the regulation of CDK activity. In this study, we use fission yeast  
18       to precisely measure how proteins that have been previously identified in genome wide screens as  
19       cell cycle regulators change in their levels with cell cycle progression. We identify the mitotic B-  
20       type cyclin Cdc13 and mitotic inhibitory phosphatase Cdc25 as the only two proteins that change in  
21       both whole cell and nuclear concentration through the cell cycle, making them candidates for  
22       universal cell size sensors at the onset of mitosis and cell division.

23

## 24       **Abstract**

25       We have carried out a systems-level analysis of the spatial and temporal dynamics of cell cycle  
26       regulators in the fission yeast *Schizosaccharomyces pombe*. In a comprehensive single cell analysis

27 we have precisely quantified the levels of 38 proteins previously identified as regulators of the G2  
28 to mitosis transition, and of 7 proteins acting at the G1 to S-phase transition. Only two of the 38  
29 mitotic regulators exhibit changes in concentration at the whole cell level, the mitotic B-type cyclin  
30 Cdc13 which accumulates continually throughout the cell cycle, and the regulatory phosphatase  
31 Cdc25 which exhibits a complex cell cycle pattern. Both proteins show similar patterns of change  
32 within the nucleus as in the whole cell but at higher concentrations. In addition, the concentrations  
33 of the major fission yeast cyclin dependent kinase (CDK) Cdc2, the CDK regulator Suc1 and the  
34 inhibitory kinase Wee1 also increase in the nucleus peaking at mitotic onset but are constant in the  
35 whole cell. The significant increase in concentration with size for Cdc13 supports the model that  
36 mitotic B-type cyclin accumulation acts as a cell size sensor. We propose a two-step process for the  
37 control of mitosis. First, Cdc13 accumulates in a size-dependent manner which drives increasing  
38 CDK activity. Second, from mid G2 the increasing nuclear accumulation of Cdc25 and the  
39 counteracting Wee1 introduces a bistability switch that results in a rapid rise of CDK activity at the  
40 end of G2 and thus brings about an orderly progression into mitosis.

41

## 42 **Introduction**

43 Steady state growing eukaryotic cells generally coordinate their cell cycles with cell growth by  
44 ensuring that mitosis and the associated cell division takes place when a particular cell size is  
45 attained (1–3). The mechanisms that bring about mitotic onset are known to be accurate because  
46 cell size at mitosis exhibits little variation, and also efficiently homeostatic because perturbation  
47 from a mean population size at mitosis is corrected within one to two subsequent cycles (4, 5).  
48 These control mechanisms are also integrated with cell ploidy as cells roughly double their size at  
49 mitosis with each doubling of DNA content (6–9). Given the conservation of genes involved in cell  
50 cycle control from yeasts to mammalian cells (10) and that co-ordination of mitosis and cell  
51 division with cell size is observed across eukaryotes, the molecular mechanisms involved are likely

52 to share commonalities. A number of models for monitoring cell size have been proposed (11–17),  
53 with one of the most straightforward being for changes in the concentration of a mitotic regulatory  
54 component to accompany cell size increase until a threshold level is reached that allows mitosis to  
55 proceed (18). This may be achieved either by an increase in the concentration of a mitotic activator,  
56 or by a decrease in the concentration of an inhibitor (11, 12). Such cell size sensing mechanisms  
57 could be integrated with the monitoring of ploidy by interactions such as titration of activators or  
58 inhibitors onto the DNA or chromatin (19). These sensing mechanisms must also be coupled to the  
59 activation of the cyclin dependent kinase (CDK) which brings about mitosis followed by cell  
60 division in all eukaryotes (20). The dynamics of CDK activation must be such that there is a sharp  
61 and irreversible entry into mitosis which could be influenced by the molecular mechanisms sensing  
62 cell size. In this paper we investigate these mechanisms by measuring the levels of mitotic  
63 regulators during the cell cycle, both in the whole cell and in the nucleus where critical mitotic  
64 events occur. These studies of the levels of mitotic regulators in single cells are aimed at informing  
65 our understanding of how cells sense their size and regulate the dynamics of CDK activation during  
66 the cell cycle and at the onset of mitosis.

67  
68 The fission yeast *Schizosaccharomyces pombe* is an ideal model organism for investigating the  
69 coordination of mitosis with cell size as 99% of genes (5059 genes) have previously been deleted  
70 (21) and systematically screened for cell cycle phenotypes (22). This screen uncovered a total of  
71 513 cell cycle genes. Two further screens of this collection revealed genes that specifically regulate  
72 mitotic signalling. One exploited heterozygous deletions of diploid cells where gene expression  
73 levels are reduced to half of normal to identify haploinsufficient genes, whereby cells are either  
74 advanced or delayed into mitosis at a smaller or larger size, respectively. This screen identified 17  
75 genes (23). A second screen covering 82% of viable haploid deletions (totaling 2969 genes),  
76 identified 18 genes that were advanced into the G2 to mitosis transition at a smaller size (24). These

77 genes encode proteins which are rate limiting for entry into mitosis, three of which overlapped with  
78 the haploinsufficiency study. Together these two screens identified 32 genes encoding potential  
79 mitotic regulatory molecules that also serve as candidates for cell size sensing. This gene set  
80 includes those encoding proteins at the core of the CDK cell cycle control network, such as the  
81 main CDK in fission yeast Cdc2, the G2/mitosis B-type cyclin Cdc13, the activating phosphatase  
82 Cdc25, and the inhibitory protein kinase Wee1 (25–28).

83  
84 A further reason why fission yeast lends itself well to the study of cell cycle regulation is because  
85 their simple rod shaped geometry and growth by tip extension allows for cell cycle position to be  
86 determined by cell length (29). Changes in the levels of molecules during the cell cycle can  
87 therefore be determined in asynchronous, steady state growing cultures by measuring the levels of  
88 endogenously-tagged fluorescent proteins in single cells. Such a method avoids any perturbations  
89 induced by synchronising procedures, which can disturb measurements of protein levels. Using two  
90 independent single cell approaches, we have accurately measured the precise concentrations and  
91 absolute levels of these potential mitotic regulators in the whole cell and nucleus for up to hundreds  
92 of thousands of cells at single-cell resolution throughout the cell cycle. This study has identified the  
93 subset of mitotic regulators that exhibit changes in their whole cell or nuclear concentration,  
94 making them prime candidates for cell size or ploidy sensors whose readout tunes the dynamics of  
95 CDK activity. These proteins are conserved across eukaryotes and so may therefore be of universal  
96 relevance.

97  
98 **Results**  
99 Progression through the fission yeast cell cycle is concomitant with growth of the cell by tip  
100 extension allowing for cell length to be used as an indicator of cell cycle position (Fig. 1A). Fission  
101 yeast cells have a very short G1 which occurs after mitotic exit. Binucleate and septated cells

102 contain two 1C nuclei which undergo S-phase as cell division takes place. Thus, taking account of  
103 cell length and whether cells are mononucleate, binucleate, or binucleate and septated, allows the  
104 specification of the fission yeast cell cycle. To assess the changes in the levels of mitotic regulatory  
105 molecules during the cell cycle, we endogenously tagged 30 proteins encoded by genes identified in  
106 the previously described haploinsufficiency and rate limiting screens with single colour fluorescent  
107 labels in individual wild type fission yeast strains (The 30 excludes *nsp1* and *nup186* from the  
108 original 32 because these 2 showed no measureable fluorescence when tagged). We also tagged 8  
109 more genes which could be involved in mitotic control including *cdr2*, *plo1* and *pyp3*, and for  
110 comparative purposes 9 further genes acting at the G1 to S-phase transition (*cdc10*, *cdc18*, *cdc20*,  
111 *cig1*, *cig2*, *mik1*, *pucl*, *rum1* and *srw1*). All genes were tagged with mNeonGreen, chosen for its  
112 fast maturation time and bright signal (30), other than *wee1* (N-terminal GFP) (31), *cdc13* (internal  
113 superfolder GFP) (32) and *pkal* (C-terminal GFP) (Table S1 for the full list of tagged proteins). To  
114 check that tagging of these genes did not have a major effect on cell size at mitotic onset, the length  
115 at septation was measured for all of the strains (Fig. S1). There were negligible effects for the  
116 majority, the exceptions being the tagging of *wee1* and *pyp1* which induced elongation and *cdr1*  
117 and *ppa2* which induced shortening (Fig. S1A & SC). This suggests there is some loss of function  
118 for Cdr1, Ppa2 and Pyp1 and perhaps stabilisation of Wee1, due to the tagging.

119  
120 Each strain was individually imaged using imaging flow cytometry (Amnis Imagestream X) from  
121 exponentially growing asynchronous cell cultures. This allowed us to image >100,000 cells per  
122 strain in each experiment giving high cell cycle coverage. Brightfield segmentation masks were  
123 overlaid onto fluorescence images (Fig. 1B) to allow for cell intensity measurements (Fig. 1C-H).  
124 For each strain, we plotted the mean fluorescence intensity relative to its own minimum against cell  
125 length to give an indication of the fold-change of protein level across the cell cycle (Fig. 1F-H). We  
126 show the data for three example strains (Fig. 1C-E), one that is constant in whole cell concentration

127 through the cell cycle, Cdc2-mNG (Fig. 1C), and two that show changes, Cdc13-sfGFP (Fig. 1D)  
128 and Cdc25-mNG (Fig. 1E). As expected for a mitotic B-type cyclin, Cdc13 accumulates as cell size  
129 increases and falls at the end of the cell cycle. Cdc25 showed an unexpected pattern of change by  
130 oscillating in level through the cell cycle. Its concentration fell with cell size increase in the first  
131 third of the cycle, before reaccumulation from mid G2 to a peak at mitotic onset.

132  
133 The data for genes encoding mitotic regulatory proteins are shown in Fig. 1F, for proteins acting at  
134 the G1 to S-phase transition in Fig. 1G, and for other potential regulators of mitotic control in Fig.  
135 1H. The data for G1 to S phase transition proteins excluded data for Cig1, whose G2 levels were  
136 too low to meaningfully plot, and Rum1 which was not visible under physiological growth  
137 conditions. What is striking about our results is that the vast majority of potentially mitotic  
138 regulatory molecules showed almost no change in concentration as cell size increased during the  
139 cell cycle. The changes were often less than 1.1x, and at most 1.3x, with no evidence for a  
140 consistent increase in concentration as cells increased in size. The two exceptions out of the 38  
141 mitotic control cell cycle proteins assayed were Cdc13 and Cdc25 (Fig. 1D-E & 1F), which change  
142 as cell size increases. The concentration of both Cdc13 and Cdc25 peak at mitosis, and so these  
143 proteins are candidates for being cell size sensing regulatory molecules at the G2 to mitosis  
144 transition as has been suggested previously (11, 17, 33).

145  
146 The situation with respect to the proteins acting at the G1 to S-phase transition is different. Of the 7  
147 proteins assayed (excluding Cig1 and Rum1), Cdc18, Cig2, Mik1, and Srw1 showed a significant  
148 change in concentration of 2-fold or more, though Puc1 was less so (Fig. 1G). They all peak at  
149 G1/S and then fall in level as the cells proceed through G2. In the case of Cdc18 and Mik1 their  
150 concentration peak as cells proceed through mitosis, while Cig2, Puc1 and Srw1 all peak after  
151 mitosis. We conclude that protein concentration changes appear to be more of a feature of the G1 to

152 S-phase transition than is the case for the G2 to mitosis transition. The reductions in concentration  
153 of these proteins observed as cells increase in size through G2 to mitosis could in principle indicate  
154 that they have a role in co-ordinating cell size increase with mitotic onset, but there is no evidence  
155 from our previous screens that the loss of any of these 7 genes influences cell size at mitosis (23,  
156 24).

157

158 We next turned from imaging flow cytometry to widefield microscopy which allowed us to  
159 investigate changes in cell cycle protein levels as well as spatial distributions. Utilising a camera  
160 with a large field-of-view and the use of accurate cell segmentation with the neural network  
161 segmentation software *YeaZ* (34) we could image thousands of cells at high spatial resolution.  
162 Septating G1 cells were analysed separately even if still physically connected (Fig. 1A).

163

164 The proteins analysed in this study cover a broad range of regulatory and biological pathways (23,  
165 24). Visual inspection revealed a range of localisation patterns, including the cytoplasm, nucleus,  
166 spindle, spindle pole body (SPB), cell tips and septum (Images and full descriptions of all strains  
167 used in this study are available in the Extended Supplement). Of the 47 proteins examined, 36  
168 showed a nuclear localisation, 29 of which accumulated at a higher level in the nucleus compared  
169 to the cytoplasm, and 7 of which showed accumulation at the SPB (Cdc2, Cdc13, Clp1, Suc1, Wee,  
170 Cig1, Cig2 and Cdr2). For each strain we plotted the whole cell mean intensity versus length and  
171 absolute intensity versus length. Focussing first on the mitotic regulatory proteins analysed in Fig.  
172 1F, we confirmed that only Cdc13 (Fig. 2F) and Cdc25 (Fig. 2J) changed their whole cell  
173 concentrations to peak at mitotic entry, with patterns of increase across the cell cycle similar to  
174 those observed from imaging flow cytometry (Fig. 1F).

175

176 Next, we turned our attention to changes in the localised concentration of proteins during the cell  
177 cycle. Due to the localisation of proteins being specific to each strain we calculated a mean of a top  
178 percentage of pixels in order to estimate local changes in concentration. Particular attention was  
179 paid to levels in the nucleus as a mitotic regulatory protein at this location could be indicative of an  
180 interaction with DNA and thus ploidy sensing. The nuclear volume in fission yeast increase as cells  
181 proceed through the cell cycle as a fixed proportion of cell size (9, 35–37). In a 2D image the  
182 nucleus occupies approximately 15% of the total cell area, so for strains that appeared to be nuclear  
183 localised we approximated the changes in nuclear level from single colour imaging by determining  
184 the mean of the top 15% of pixels (nuclei could not be segmented from single colour imaging for  
185 proteins that leave the nucleus at mitosis such as Cdc2 and Cdc13). This analysis allowed a rapid  
186 and indicative screen of the ‘nuclear’ localisation behaviour of the cell cycle proteins. Of the 29  
187 proteins that preferentially localised to the nucleus, 12 showed concentration changes through the  
188 cell cycle (Cdc2, Cdc10, Cdc13, Cdc18, Cdc25, Cig1, Cig2, Clp1, Mik1, Srw1, Suc1 and Wee1).  
189 Five of the 12 peaked in concentration at the G2 to mitosis transition: Cdc2 (Fig. 2D), Cdc13 (Fig.  
190 2H), Cdc25 (Fig. 2L), Suc1 (Fig. 2P) and Wee1 (Fig. 2T). Cdc13 (Fig. 2F & H) and Cdc25 (Fig. 2J  
191 & L) both showed similar patterns of increase in the ‘nucleus’ as in the whole cell, whilst Cdc2  
192 (Fig. 2B & D), Suc1 (Fig. 2N & P) and Wee1 (Fig. 2R & T) all exhibited ‘nuclear’ concentration  
193 increases with increasing cell size while their whole cell concentrations remained constant. Clp1  
194 showed a dynamic change in localisation from the nucleolus and SPB to the spindle (Fig. 2U). This  
195 was emulated by the mean of the top 15% of pixels showing a concentration peak in early G2  
196 before being held at a stably high level through to mitosis (Fig. 2X). For Clp1, such an early cell  
197 cycle pattern of accumulation is not consistent with models for size sensing at the G2 to mitosis  
198 transition.  
199



200 In the case of the the G1 to S-phase proteins (Fig. 3), Cig2 (Fig. 3A-B) Cdc18 (Fig. 3E-F), Mik1  
201 (Fig. 3G-H) and Srw1 (Fig. 3I-J) also showed whole cell patterns of expression consistent with the  
202 imaging flow cytometry data (Fig. 1G). Being able to split septated cells from widefield  
203 microscopy images meant that peak intensity for these proteins could be observed more clearly at  
204 the G1 to S-phase transition. For Cdc18 (Fig. 3F), Mik1 (Fig. 3H) and Srw1 (Fig. 3J) the highest  
205 concentrations were found in the shortest cells indicative of peak levels after binucleation and at the  
206 point of septation. For all three proteins this level reduced to a low level by mid G2. For Cdc10, as  
207 for imaging flow cytometry, the peak was only slightly elevated in short cells (approximately 1.2x)  
208 and was relatively stable though the rest of the cycle (Fig. 3K-L). Cig2 concentration increased  
209 from G1 to a peak early in G2. Its level reduced as cells proceeded through the cell cycle to a low at  
210 mitosis (Fig. 3A-B). The pattern of whole cell Cig2 expression was matched by its ‘nuclear’  
211 concentration (Fig. 3D). We also report the first visulisation of endogenous Cig1 expression (see  
212 Extended Supplement). While its expression level proved too low to accurately quantify by our  
213 methods of analysis, the images show visible Cig1-mNG fluorescence at both single and duplicated  
214 SPBs in G2, and then transiently throughout the nucleus at anaphase and nuclear division (Fig.  
215 3M). Overall, these results confirm our earlier conclusion that changes in cell cycle protein  
216 concentrations is more a feature of the G1 to S-phase transition than for G2 to mitosis.

217  
218 Our ‘nuclear’ screen suggested that 5 members of the core set of cell cycle CDK regulators Cdc2,  
219 Cdc13, Cdc25, Suc1 and Wee1 increase in nuclear concentraton to a peak at mitotic entry. To  
220 confirm nuclear localisation and quantify precise nuclear levels we used a dual-colour imaging  
221 approach to image each fluorescently tagged regulator alongside Cut11-mCherry, a component of  
222 the nuclear core complex, to mark the nucleus for segmentation. Fission yeast are particularly  
223 amenable to tracking of nuclear localisation patterns throughout the whole cell cycle due to having  
224 a closed mitosis. We used a combination of whole cell neural network segmentation with *YeaZ*, and

225 machine learning nuclear segmentation with *Ilastik* (38) (Fig. S2). Examining cells from  
226 asynchronous populations from early G2 through to septation, allowed us to visually determine how  
227 the localisation of these regulators changed (Fig. 4 & Fig. S3). Taking Cdc2-mNG as an example  
228 (Fig. 4A), for cells in G2 the signal can be seen to be nuclear enriched (Fig. 3A) and to accumulate  
229 on the SPB, as previously observed (39). After SPB duplication, Cdc2 concentrates on both SPBs  
230 and the connecting spindle. As the nucleus elongates in anaphase, Cdc2 is exported from the  
231 nucleus, prior to reaccumulation in the next cycle after nuclear division. In the associated dot plot  
232 (Fig. 4B), the mean cellular concentration for each cell (represented in blue) remains constant  
233 throughout the cell cycle consistent with previous whole cell measurements (Fig. 1F & 2A).  
234 Mononucleate nuclear Cdc2 concentration (green) increases with cell length throughout the cell  
235 cycle (Fig. 4B) reaching a peak at mitotic entry. In long mononucleates that are  $>12\ \mu\text{m}$ , Cdc2  
236 levels decrease again, thus indicating that Cdc2 leaves the nucleus in mitosis. Pink dots represent  
237 the nuclear concentration of binucleate cells that have not yet septated and show that nuclear levels  
238 of Cdc2 post mitosis reduce to a level equal to the whole cell concentration.

239

240 Nuclear concentration patterns for Cdc13 (Fig. 4C), Cdc25 (Fig. 4D), Suc1 (Fig. 4E), Wee1 (Fig. 4F)  
241 match their ‘top 15%’ analyses (Fig. 2H, L, P, T) and establish that these core CDK mitotic regulators  
242 all increase in concentration within the nucleus as cell size increases. For Cdc2 this appears to be a  
243 continuous increase correlated with size and more than doubles in concentration from early G2 to  
244 mitosis (Fig. 4B). For Suc1, nuclear concentration increases at the beginning of the cell cycle,  
245 plateaus in mid-G2 and then reaccumulates into mitosis, increasing 1.5x across the full cycle (Fig.  
246 4E). Likewise, Wee1 nuclear concentration also increases 1.5x with a continuous increase to mid-G2  
247 followed by a plateau until mitosis (Fig. 4F). Unlike Cdc2, Cdc13 and Suc1, which show a rapid exit  
248 from the nucleus at mitotic exit as shown by nucleus levels of binucleate cells matching the level of  
249 the whole cell, Wee1 appears to be only partially exported as indicated by binucleate nuclear levels

250 being raised above the level of the whole cell. For Cdc25 in Fig. 2J we showed that whole cell levels  
251 increased nearly two-fold from mid-G2 to mitosis and this is recapitulated in Fig. 4D. Nuclear  
252 accumulation of Cdc25 follows a similar pattern but at a higher concentration than compared to whole  
253 cell levels, with nuclear levels again increasing around two-fold from mid-G2 to mitosis and then  
254 maintained at a high level after binucleation. Cdc25 nuclear export begins at the point of septation,  
255 with faint puncta observed at the nuclear periphery suggestive of active nuclear export (Fig. S3B).  
256 Nuclear levels gradually decrease in concentration in early G2 (in short cells < 8  $\mu\text{m}$ ).

257  
258 The protein that changed most significantly was the mitotic B-type cyclin Cdc13. In the whole cell  
259 the span of the increase is approximately 4-5x (Fig. 2D and Fig. 4C) which is amplified in the nucleus  
260 to 8-10x (Fig. 4C). This makes Cdc13 the best candidate cell size sensor due to its high dynamic  
261 range through the cell cycle, particularly in the nucleus.

262  
263 Returning to our imaging flow cytometry data, we looked to measure the nuclear rate of change for  
264 Cdc13 and Cdc25. From mid G2 towards mitotic entry (8-12  $\mu\text{m}$ ) we find that nuclear accumulation  
265 of Cdc13 occurs at an almost constant linear rate after a rise at the beginning and a fall at the end of  
266 the cell cycle (Fig. 4G). In contrast, the rate of Cdc25 nuclear accumulation increases in an  
267 exponential manner during the second half of the cell cycle (Fig. 4H). Cdc13 and Cdc25 both activate  
268 the G2-M CDK but in different ways: Cdc13 forms a complex with Cdc2 for direct activation, while  
269 Cdc25 phosphatase activates by removing the inhibitory Cdc2-Y15 phosphorylation. This suggests  
270 that the mode of CDK regulation during the cell cycle switches from a mode that is predominantly  
271 dependent upon cyclin accumulation to a mode that is additionally subject to the futile cycle of the  
272 activating Cdc25 phosphatase counteracting the inhibitory action of Wee1 protein kinase.

273

274 **Discussion**

275 In this paper we have determined how the levels of potential mitotic regulators change during the  
276 cell cycle in both the whole cell and the nucleus of fission yeast, with the aim of informing our  
277 understanding of how cells sense their size and regulate the dynamics of CDK activation at the  
278 onset of mitosis. We measured the levels of 30 proteins previously identified as potential mitotic  
279 regulators (23, 24) throughout the cell cycle together with 8 more proteins implicated in mitotic  
280 control, and a further 7 involved in the G1-S phase transition. Surprisingly, of the 38 G2 to mitosis  
281 regulators, 36 remained constant in concentration within the whole cell throughout the cell cycle.  
282 Therefore if they were to have a influence on cell cycle progression through CDK regulation this  
283 would have to be due to dynamic changes in their activity status, for example by changing  
284 phosphorylation levels or through changes in their spatial distribution. Only two mitotic regulators,  
285 the mitotic B-type cyclin Cdc13 and the activating Cdc25 phosphatase, change in whole cell levels  
286 with both peaking at the onset of mitosis.

287  
288 The behaviour of the 7 proteins involved in the G1 to S-phase transition was different, with 4  
289 changing dynamically in the whole cell during the cell cycle peaking at G1-S. We propose that  
290 changes in the level of protein concentration is more a a feature at the G1 to S-phase transition than  
291 G2 to mitosis. These could be involved in cell size sensing at the G1 to S-phase transition because  
292 there is a cell size control acting at this checkpoint in fission yeast, although it is normally cryptic  
293 and does not normally influence cell size at mitosis and cell division (40, 41). In budding yeast,  
294 several models for G1 to S-phase cell size sensing invoke the need for S-phase regulators to attain a  
295 critical concentration before S-phase can commence (12, 42, 43).

296  
297 Over three quarters of the cell cycle proteins investigated were primarily located in the nucleus  
298 during interphase and 29 of them accumulated in the nucleus to a higher level than the cytoplasm.  
299 This nuclear enrichment could be due to critical cell cycle events occurring in the nucleus in a

300 closed mitosis, but also given the nuclear localisation of DNA these proteins could also be  
301 candidates for being involved in ploidy sensing mechanisms. Seven proteins were also associated  
302 with the spindle pole body, including core CDK regulators (Cdc2, Cdc13, Clp1, Suc1, Wee1, Cig1,  
303 Cig2 and Cdr2), providing support for the long held view that the centrosome plays a critical role in  
304 cell cycle control (44, 45). Nine of the 29 nuclear-located proteins undergo significant changes  
305 during the cell cycle, six of which are core CDK regulators (Cdc2, Cdc13, Cdc25, Suc1, Wee1 and  
306 Cig2). This finding supports work from mammalian systems that cell cycle regulated nuclear  
307 import plays an important role in allowing the cell to reach the point of mitotic onset by gradually  
308 bringing about the nuclear accumulation of mitotic CDK regulators (46). Consistent with nuclear  
309 transport playing a regulatory role is the fact that 6 of the 17 genes identified in the  
310 haploinsufficient screen are involved in nuclear transport (23).

311  
312 The control of CDK activity required for mitotic onset is highly dependent upon both the level of  
313 the Cdc2 activating mitotic B-type cyclin Cdc13, and the regulatory feedback loop consisting of the  
314 counteracting phosphatase activator Cdc25 and the protein kinase inhibitor Wee1 (27, 47). This  
315 regulatory loop determines the extent of the inhibitory Cdc2 Y15 phosphorylation. We have shown  
316 that the whole cell concentration of Wee1 remains reasonably constant, but Cdc25 levels oscillate  
317 significantly through the cell cycle. This suggests that the activating potential of the Cdc25/Wee1  
318 regulatory loop follows the Cdc25 concentration profile by being high at the beginning of the cell  
319 cycle, at a time when cyclin-CDK nuclear levels are low, falling to a low by mid-G2 and then rising  
320 towards mitosis onset. When Wee1 is inactivated by a temperature shift of a Wee1<sup>ts</sup> mutant, cells in  
321 the second half of G2 are immediately advanced into mitosis (26). This indicates that the  
322 Cdc25/Wee1 regulatory loop is restraining mitotic onset during the second half of G2, even though  
323 there is sufficient CDK formed by the Cdc13/Cdc2 complex in mid-G2 for mitotic onset to take  
324 place.

325  
326 Cdc13 concentration rises dramatically throughout the cell cycle, much more than any other protein  
327 investigated in this study. This level rises 4-5x in the whole cell and 8-10x in the nucleus. At the  
328 point in mid-G2 when the Cdc25/Wee1 regulatory loop begins to rise, Cdc13 concentration is about  
329 two thirds of the maximum reached at the onset of mitosis. We conclude that this level of cyclin is  
330 sufficient to generate enough CDK activity to undergo mitosis, but is restrained by the Cdc25/Wee1  
331 regulatory loop until late in G2. The difference in Cdc13 concentration from mid G2 to mitotic  
332 onset is about one third, which could correspond to a ‘CDK buffer zone’ where cells undergo  
333 mitosis with a higher level of CDK activity than is strictly necessary for the completion of mitosis  
334 (17, 48).

335  
336 We propose that the increasing level of Cdc13 is primarily responsible for cell size sensing at the  
337 G2 to mitosis transition (17) and that this is the major mechanism by which eukaryotic cells  
338 maintain cell size homeostasis at cell division. As B-type cyclin increases in concentration  
339 throughout the cell cycle and peaks at mitosis in all eukaryotes investigated thus far, this could be a  
340 universal cell size sensing mechanism, with the advantage over cell geometry sensing mechanisms  
341 (13–16) of being independent of a fixed cell shape, and therefore having the potential to be  
342 applicable to all cell types including metazoans.

343  
344 The observations we have reported here also have implications for the dynamics of CDK regulation  
345 at the onset of mitosis. We have proposed that the increasing level of the B-type cyclin Cdc13 is  
346 primarily responsible for cell size sensing at the G2 to mitosis transition, with a possible further  
347 contribution provided by the increasing level of Cdc25 during the later part of G2 (33). Our  
348 analysis suggests that the minimum level of Cdc13 required for mitosis and cell division is  
349 established in mid-G2 when the cell attains a threshold size. However the linear increase in Cdc13

350 level from mid G2 to mitosis likely results in a change in CDK activity which is too gradual at the  
351 end of the cell cycle to bring about an orderly sharp transition into mitosis. We propose that the cell  
352 solves this problem by a two-step process. The first step is based on B-type cyclin Cdc13  
353 accumulation that can accurately monitor cell size whilst Cdc25 levels are reducing and low. The  
354 second step, activated in mid-G2, is based upon the Cdc25/Wee1 regulatory loop. The increasing  
355 Cdc25 level sets up a futile cycle introducing bistability which results in a rapid rise in CDK  
356 activity and a sharp orderly progression through the multiple events of mitosis, thereby reducing the  
357 variability in size at division. Accumulation in the nucleus in a size dependent manner could also  
358 amplify any potential cell size sensing mechanism (46, 49). In all eukaryotes studied so far, mitotic  
359 B-type cyclin rises significantly throughout the cell cycle and a Cdc25-like phosphatase with a  
360 Wee1 protein kinase regulates CDK activity through control of tyrosine phosphorylation of the  
361 CDK protein kinase (50–52). Therefore this two-step model of mitotic B-type cyclin accumulation  
362 through the cell cycle sensing cell size, coupled with a subsequent Cdc25/Wee1 futile cycle  
363 introducing bistability and rapid CDK activation, may be a universal feature of eukaryotic cell  
364 cycle control given the conservation of the control elements throughout eukaryotes.

365

## 366 **Acknowledgments**

367 We would like to thank the Silke Hauf and Yasushi Hiraoka labs for sharing of *S. pombe* strains;  
368 Sahand Jamal Rahi for training of *YeaZ* for fission yeast cell segmentation; James Patterson  
369 (previous Nurse lab) for construction and sharing of plasmids; members of the Nurse lab: Thomas  
370 Hammond, Emma Roberts & Theresa Zeisner and Tiffany Mak (previous member) for critical  
371 reading of the manuscript and comments. S.C. and P.N. were supported by the Francis Crick  
372 Institute which receives its core funding from Cancer Research UK (FC01121), the UK Medical  
373 Research Council (FC01121), and the Wellcome Trust (FC01121). In addition, this work was  
374 supported by the Wellcome Trust grant to P.N. [Grant numbers: 214183 & 093917]. G.D.

375 acknowledges UCL, the Wellcome Trust (203276/Z/16/Z), and the European Molecular Biology  
376 Laboratory for support. P.R. acknowledges the support of the Biotechnology and Biological  
377 Sciences Research Council under grant BB/P026818/1 and the Engineering and Physical Science  
378 Research Council under grant EP/N013506/1.

379

### 380 **Author Contributions**

381 S.C. designed and implemented all experiments, generated strains, acquired, analysed and  
382 interpreted data, and co-drafted the manuscript. P.N. conceived and supervised the project,  
383 provided advice on experimental design and analysis, and co-drafted the manuscript. G.D. advised  
384 on experimental analyses and wrote MATLAB scripts for the heatmap production and widefield  
385 image analyses. P.R. performed the derivative analysis.

386

### 387 **Figure Legends**

#### 388 **Figure 1**

#### 389 **Only Cdc13 and Cdc25 increase in whole cell concentration to a peak at mitotic entry**

390 **A**, Schematic of the fission yeast cell cycle. Cells increase in length with progression through G2.  
391 Green indicates a representative protein that increases in nuclear concentration with cell cycle  
392 progression and increasing cell length that decreases in nuclear concentration after nuclear division.  
393 Cell growth slows as cells enter mitosis and undergo nuclear division. G1 and S-phase occur in  
394 binucleates as cells septate. For *YeaZ* cell segmentation binucleate cells are split at the point of  
395 septation, so cells in G1-S are the shortest cells in the plots for Figures 2-4. **B**, Representative  
396 images of a mononucleate Cdc2-mNG cell imaged by imaging flow cytometry. Top left,  
397 Brightfield; Bottom left, mNG. Top right, Segmentation mask of BF image. Bottom right, Overlay  
398 of mask onto fluorescent image. Scale bar, 5  $\mu\text{m}$ . **C-E**, Plots of imaging flow cytometry data for  
399 Cdc2-mNG (**C**), Cdc13-sfGFP (**D**) and Cdc25-mNG (**E**) populations showing mean whole cell



400 fluorescence intensity against cell length. Circles indicate mean, Error bars = 95% CI. Length bins  
401 = 0.33  $\mu\text{m}$ , >500 cells/bin. n = **C**, 183,435 cells; **D**, 171,425 cells; and **E**, 178,598 cells. **F**, Heatmap  
402 showing the mean cellular fluorescence intensity for asynchronous populations of strains  
403 fluorescently tagged for mitotic regulators. Mean intensity for each 0.33  $\mu\text{m}$  length bin is  
404 normalised to each strain's minimum and plotted against cell length. >500 cells/bin. All strains are  
405 endogenously tagged with mNG, except for Cdc13 (internal sfGFP), Wee1 (N-terminal GFP) and  
406 Pka1 (C-terminal GFP). **G**, as **F** except for G1 to S-phase transition genes, and **H**, for other genes  
407 of interest involved in mitotic control.

408

## 409 **Figure 2**

410 **The core mitotic regulators Cdc2, Cdc13, Cdc25, Suc1, and Wee1 increase their localised**  
411 **concentrations to a peak at mitotic entry, whilst Clp1 increases to a peak by early G2.**

412 **A, E, I, M, Q & U**, Images of fission yeast cells (green outline) for Cdc2-mNG (**A**), Cdc13-sfGFP  
413 (**E**), Cdc25-mNG (**I**), Suc1-mNG (**M**), Wee1-GFP (**Q**) and Clp1-mNG (**U**) from asynchronous cell  
414 cultures each showing a range of cells across the cell cycle. Images are maximum intensity  
415 projections. Scale bar 5  $\mu\text{m}$ . **B-D, F-H, J-L, N-P, R-T & V-X**, Plots show mean whole cell  
416 fluorescence intensity (blue), total cellular fluorescence intensity (teal) and mean of the top 15% of  
417 cellular pixel values (red) plotted against cell length for Cdc2-mNG (**B-D**), Cdc13-sfGFP (**F-H**),  
418 Cdc25-mNG (**J-L**) Suc1-mNG (**N-P**), Wee1-GFP (**R-T**) and Clp1-mNG (**V-X**). Coloured dots  
419 represent individual cell values. Circles represent mean values at 0.25  $\mu\text{m}$  length bins with >10  
420 cells/bin. Error bars represent 95% CI. Means stop for **D, F-H & P** before cell populations become  
421 bimodally distributed. Vertical dotted line represents septation length. n = **A-D**, 6,989 cells; **E-H**,  
422 5,895 cells; **I-L**, 11,091 cells; **M-P**, 6,513 cells; **Q-T**, 1,863 cells; **U-X**, 1,838 cells.

423

## 424 **Figure 3**

425 **G1 to S phase transition proteins are transiently expressed early in the cell cycle.**  
426 **A, E, G, I & K**, Images of fission yeast cells (green outline) for Cig2-mNG (**A**), Cdc18-mNG (**E**),  
427 Mik1-mNG (**G**), Srw1-mNG (**I**) and Cdc10-mNG (**K**) from asynchronous cell cultures each  
428 showing a range of cells across the cell cycle. Images are maximum intensity projections. Scale bar  
429 5  $\mu\text{m}$ . **B - C**, Cig2-mNG plots show mean whole cell fluorescence intensity (blue), total cellular  
430 fluorescence intensity (teal) and mean of the top 15% of cellular pixel values (red) plotted against  
431 cell length. **F, H, J & L**, Mean whole cell fluorescence intensity plots against cell length for Cdc18-  
432 mNG (**F**), Mik1-mNG (**H**), Srw1-mNG (**J**) and Cdc10-mNG (**L**). Coloured dots represent  
433 individual cell values. Circles represent mean at 0.25  $\mu\text{m}$  length bins with >10 cells/bin. Error bars  
434 represent 95% CI. Vertical dotted line represents septation length. n = **B-D**, 2,953 cells; **F**, 4,644  
435 cells; **H**, 3683 cells; **J**, 1,946 cells; **L**, 2,978 cells. **M**, representative images of Cig1-mNG cells  
436 (green outline) at progressive cell cycle stages. Images are maximum projections normalised to  
437 peak intensity level (at SPB). Pink arrows indicate Cig1-mNG localisation. Scale bar, 2  $\mu\text{m}$ .  
438

#### 439 **Figure 4**

#### 440 **The core mitotic regulators increase their nuclear concentrations to a peak in late G2.**

441 **A**, Montage showing representative Cdc2-mNG cells (green outline) selected from an asynchronous  
442 population at progressive stages of the fission yeast cell cycle from early G2 through to septation.  
443 Top, Brightfield; Middle, Inverted fluorescence images for Cdc2-mNG; Bottom, Inverted  
444 fluorescence images for Cut11-mCh (nuclear marker). mNG intensities are maximum intensity  
445 projections normalised min-to-max for all pixels within the montage. Cut11-mCh images are  
446 maximum intensity projections re-normalised from 10,000 to 50,000-pixel values (64-bit images).  
447 Pink arrows indicate nuclei position for comparison of Cdc2 localisation. Scale bars = 5  $\mu\text{m}$ . **B - F**,  
448 Plots showing mean cellular fluorescence intensity (light blue), mean nuclear fluorescence for  
449 mononucleate cells (green) and binucleates (pink) against cell length for Cdc2-mNG (**B**), Cdc13-

450 sfGFP (**C**), Cdc25-mNG (**D**), Suc1-mNG (**E**) and Wee1-GFP (**F**). Coloured dots represent  
451 individual cell values. Black lines represent connected mean values calculated at 0.5  $\mu\text{m}$  bins for  
452 whole cell values (bottom), and nuclear mononucleate values (top). Note, binucleates with a septum  
453 are split during segmentation with each half treated as an individual mononucleate. Vertical dotted  
454 line indicates septation length. n = **B**, 5,857 cells; **C**, 6,235 cells; **D**, 5,920 cells; **E**, 5,832 cells; **F**,  
455 5,189 cells. **G & H**, Rate of change plots for nuclear accumulation of Cdc13-sfGFP (**F**) and Cdc25-  
456 mNG (**G**). For each strain, plots on the left show mean peak nuclear intensity (Peak Intensity)  
457 against cell length. Raw data values in black, smoothed data values in pink. Plots on the right are  
458 the rate of change of Intensity of smoothed data (dI)/Cell Length (dL) from each unit of length to  
459 the next. Positive values indicate accumulation, whilst negative points indicate loss. Increasing  
460 values indicate an increasing rate of accumulation. Values at 0 indicate a stable concentration.  
461 Vertical dotted line on each plot indicates cell length at mitosis. n = **G**, 194,326 cells; **H**, 223,364  
462 cells.

463

#### 464 **Supplementary Figure 1**

##### 465 **Cell length at septation for all widefield microscopy imaged strains in this study**

466 **A**, Plot showing the quantification of cell length at septation for fluorescently tagged mitotic  
467 regulators. Colour indicates whether the tagged protein was included in this analysis due to its  
468 presence in our laboratory's previous haploid deletion screen (pink) (24), heterozygous deletion  
469 haploinsufficiency screen (blue) (23), or both (green). Dots indicate mean, Error bars indicate S.D.  
470 n ranges from 100 - 757 cells per strain. All strains tagged with mNeonGreen except for Cdc13  
471 (internal sfGFP), Wee1 (N-terminal GFP) and Pka1 (C-terminal GFP). **B - C**, as for **A** except for  
472 genes associated with the G1 to S-phase transition (**B**) or for other genes of interest involved in  
473 mitotic control (**C**). n = **B**, 81 - 608 cells per strain and **C**, 70 - 336 cells per strain. **B - C**, All  
474 strains are tagged with mNeonGreen.

475

## 476 **Supplementary Figure 2**

### 477 **Schematic of the whole cell and nuclear segmentation pipeline using *YeaZ* and *Ilastik* for**

### 478 **widefield imaging.**

479 Along the left, brightfield images of whole cells are segmented with *YeaZ*. Cells with septa are split  
480 into two individual cells to allow for clearer analysis of localisation and level changes occurring at  
481 the G1 to S-phase transition. Cell segmentation is exported as a binary image. Along the right,  
482 Cut11-mCh (nuclear marker) is segmented with *Ilastik* and converted to a binary image. *YeaZ* and  
483 *Ilastik* binary masks are combined and overlaid onto the tagged protein-of-interest (in this example  
484 Cdc2-mNG) to allow for whole cell measurements (bottom left), or nuclear cell-associated  
485 measurements (bottom right).

486

## 487 **Supplementary Figure 3**

### 488 **Cell cycle montages showing nuclear accumulation of core mitotic regulators**

489 Montages showing representative cells (green outlines), selected from asynchronous populations at  
490 progressive stages of the fission yeast cell cycle from early G2 through to septation for Cdc13-  
491 sfGFP (A), Cdc25-mNG (B), Suc1-mNG (C), Wee1-GFP (D) and Cig2-mNG (E). Top, Brightfield  
492 images; Middle, Inverted fluorescence images; Bottom, Inverted fluorescence images of Cut11-  
493 mCh (nuclear marker). Fluorescence images for mNG and GFP are maximum intensity projections  
494 normalised min-to-max for all pixels within each montage. Cut11-mCh images are maximum  
495 intensity projections normalised from 10,000 to 50,000-pixel values (64-bit images). Scale bars = 5  
496  $\mu\text{m}$ . F, Plot showing mean cellular fluorescence intensity (light blue), mean nuclear fluorescence  
497 for mononucleate cells (green) and binucleates (pink) plotted against cell length for Cig2-mNG.  
498 Black lines represent connected mean values calculated at 0.5  $\mu\text{m}$  bins for whole cell values

499 (bottom), and nuclear mononucleate values (top). Vertical dotted line indicates cell length at  
500 septation. n = 5,221 cells.

501

## 502 **Methods**

### 503 **Lead Contact and Materials Availability**

504 Further information and requests for resources and reagents should be directed to Paul Nurse  
505 (paul.nurse@crick.ac.uk).

506 All strains, plasmids and reagents generated in this study are available without restriction.

507

### 508 ***Schizosaccharomyces pombe* culture**

509 Cells were cultured by standard growth methods as previously described (53) first on solid YE4S  
510 agar and then in liquid Edinburgh Minimal Media supplemented with 20.0 g/L Dextrose Anhydrous  
511 (Fisher Scientific BP350-1) and 5.0 g/L Ammonium Chloride (Sigma A9434) (supplemented with  
512 adenine, leucine, histidine and uracil to a concentration of 0.15 g/L for autotrophic markers if  
513 required) added post-autoclaving and filtered (0.22 µm). Cells were grown at 25°C and maintained  
514 in exponential growth between  $2 \times 10^6$  and  $1 \times 10^7$  cells/ml (ideally imaged at  $\sim 5 \times 10^6$  cells/ml).

515

### 516 **Strains**

517 See Table S1 for complete list and full genotypes of *S. pombe* strains used in this study. Strains  
518 generated specifically for this study were constructed using standard methods (53, 54). C-terminal  
519 gene tagging was performed as previously described (55) using standard primers (Listed in Table  
520 S2) designed from the Bähler lab web-interface (bahlerlab.info/resources) for pFA6a vector  
521 templates carrying kanamycin or GFP-hygromycin resistance cassettes using the lithium acetate  
522 method of transformation. pFA6a-Kan vectors were modified by James Patterson for mNeonGreen

523 tagging which carry a non-standard linker (GATTCTGCTGGATCAGCTGGC) upstream of  
524 mNeonGreen with the standard forward linker (CGGATCCCCGGGTAAATTA) replaced.

525

526

## 527 **Fluorescence Microscopy**

528 For widefield microscopy, 1.5 ml of 0.4-0.5 OD<sup>595</sup> culture was centrifuged at 3,000 rpm for 30 s,  
529 with the supernatant removed and the process repeated. 1.75 µl of pelleted cells were plated on a  
530 microscope slide, spread and flattened with addition of a coverslip. Live cells were imaged within  
531 10 mins of preparation. All microscopy was performed at 25°C using a Nikon Ti2 Inverted  
532 microscope with a 100X Plan Apochromat oil immersion objective (NA 1.45), Perfect Focus  
533 System, a Prime sCMOS camera (Photometrics) and Okolab environmental chamber. The  
534 microscope was controlled with Micro-Manager v2.0 software (56). Fluorescence excitation was  
535 performed with a SpectraX LED light engine (Lumercor) fitted with standard filters: 470/24 for  
536 imaging mNG/sfGFP/GFP and 575/25 for mCherry with a dual-edge Chroma 59022bs, ET -  
537 EGFP/mCherry dichroic beamsplitter. Emission filters used were Chroma, ET - EGFP single-band  
538 bandpass filter (ET525\_50m) for mNG/sfGFP/GFP and Semrock, 641/75 nm Brightline single-  
539 band bandpass filter (FF02\_641\_75) for mCherry.

540

## 541 **Widefield Image Processing**

542 Basic image processing was carried out with FIJI software (57). Whole cell segmentation was  
543 performed using the convolutional neural network *YeaZ* (34) trained for fission yeast segmentation  
544 on brightfield image slices 1 µm below the focal plane. Using FIJI, maximum intensity projections  
545 were made of sfGFP/GFP/mNG/mCherry images covering 2 µm around the focal plane. The  
546 machine learning tool *Ilastik* (38) was trained and used to segment maximum projection mCherry  
547 images to create nuclear masks. For background correction, controls without the fluorescent tag of

548 interest for each experiment were imaged to give a measure of mean autofluorescence. This value  
549 was subtracted from whole cell and nuclear concentration measurements.

550

551

## 552 **Imaging flow cytometry and post-processing**

553 Cells were imaged for brightfield and fluorescence (488 laser at 400 mW) with an Amnis  
554 Imagestream X Mk II Imaging Flow Cytometer with a 60X objective lens. Cells were concentrated  
555 from asynchronous exponentially growing cultures ( $OD^{595} \sim 0.4-0.5$ ) by centrifugation (3000  
556 rpm/30 s), resuspended in  $>50 \mu\text{l}$  of media and waterbath sonicated for 15 s. Prior to acquisition,  
557 cells were gated based upon BF Gradient RMS values (value of cell focus) of 65 - 78, and  
558 Area/Aspect Ratio values consistent with single cells. Approximately 250,000 gated cells were  
559 acquired in 10 - 15 min experiments with an acquisition rate of 300 - 500 gated cells/s.

560

561 Post-acquisition processing was undertaken with Amnis IDEAS 6.2 data exploration and analysis  
562 software. Cell segmentation masks were created from BF images: (Erode(MO1, 3) named  
563 Pombe\_Mask and overlaid onto fluorescent images (Ch02).

564 Cells were further gated based on:

565 R1: Width\_Pombe X coordinates: 3.75 - 6.75

566 R2: Thickness\_Max\_Pombe of R1 X coordinates: 3.75 - 6.75

567 R3: Thickness\_Min\_Pombe of R2 X coordinates: 3.1 - 5.5

568 R4: Gradient\_RMS\_MO1\_Ch01 of R3 X coordinates: 65 - 78

569 R5: Intensity\_Pombe\_Ch02: removal of extremes on a strain-by-strain basis

570

571 Background correction was based upon imaging of a non-fluorescent control on each experimental  
572 day. Mean auto-fluorescence per length bin was calculated as a linear regression and used to

573 calculate the level of background to be subtracted from total, mean and max pixel fluorescent  
574 values.

575

576

### 577 **Derivative analyses**

578 To calculate the  $d(\text{intensity})/d(\text{length})$  values at the required lengths we first calculated the density  
579 of the experimentally measured points in the two-dimensional intensity vs length space. We used  
580 the *kde2d* Matlab routine which uses a second order Gaussian kernel with an automatic bandwidth  
581 selection method (58). The peak density at each length is then determined to give the intensity  
582 value which is then differentiated with respect to length.

583

### 584 **Calculation of the number of nuclei and nuclear intensity**

585 Using a previous approach (8, 17) we extracted the individual cell tiff images for the brightfield and  
586 each fluorescence channels from the .cif file generated by the ImageStream X instrument. A cell  
587 mask is generated from the brightfield image using a simple grayscale Otsu threshold for this  
588 image. The medial line for the cell mask is defined and the nuclear marker fluorescence intensity  
589 measured at each point along this line. A simple peak detection algorithm is used to detect if the  
590 cell is mono or binucleated. The fluorescence intensity level for each nucleus is simply determined  
591 by measuring the pixel value from the fluorescence intensity at this position along the medial line.

592

### 593 **Graphs and Statistics**

594 A custom MATLAB script was used for whole cell, nuclear and top percentage background-  
595 subtracted fluorescence measurements for widefield imaging (script author GD - this study). This  
596 script counted the number of nuclei per cell with cells having  $>2$  nuclear objects considered  
597 binucleate (Ilastik segmentation often found pieces of nuclear bridge). All plots and statistical



598 analyses were performed with Graphpad Prism 9 except for heatmaps (Fig. 1), which were  
599 produced by a custom MATLAB script of background-subtracted whole cell mean data collected  
600 from imaging flow cytometry. Statistical analyses used and n numbers are stated in the figure  
601 legends. Source data is provided with this paper.

602

### 603 **Code availability**

604 Custom MATLAB scripts used in this study are freely available on Github in a public repository at  
605 [GitHub.com/scottcurran10/fission-yeast-cell-cycle](https://github.com/scottcurran10/fission-yeast-cell-cycle). The use of this code is governed by an MIT  
606 license.

607

### 608 **References**

- 609 1. J. M. Mitchison, Growth During the Cell Cycle. *Int. Rev. Cytol.* **226**, 165–258 (2003).
- 610 2. M. B. Ginzberg, R. Kafri, M. Kirschner, On being the right (cell) size. *Science (80-. )*. **348** (2015).
- 611 3. A. C. Lloyd, The Regulation of Cell Size. *Cell* **154**, 1194–1205 (2013).
- 612 4. P. Fantes, Control of cell size and cycle time in *Schizosaccharomyces pombe*. *J. Cell Sci.* **24**, 51–67  
613 (1977).
- 614 5. E. Wood, P. Nurse, Pom1 and cell size homeostasis in fission yeast. *Cell Cycle* **12**, 3228–3236 (2013).
- 615 6. E. Wood, P. Nurse, Sizing up to Divide: Mitotic Cell-Size Control in Fission Yeast. *Annu. Rev. Cell Dev.*  
616 *Biol.* **31**, 11–29 (2015).
- 617 7. D. O. Robinson, *et al.*, Ploidy and Size at Multiple Scales in the Arabidopsis Sepal. *Plant Cell* **30**,  
618 2308–2329 (2018).
- 619 8. J. O. Patterson, S. Basu, P. Rees, P. Nurse, CDK control pathways integrate cell size and ploidy  
620 information to control cell division. *Elife* **10** (2021).
- 621 9. P. Jorgensen, *et al.*, The Size of the Nucleus Increases as Yeast Cells Grow. *Mol. Biol. Cell* **18**, 3523  
622 (2007).
- 623 10. M. G. Lee, P. Nurse, Complementation used to clone a human homologue of the fission yeast cell

- 624 cycle control gene *cdc2*. *Nature* **327**, 31–35 (1987).
- 625 11. D. Keifenheim, *et al.*, Size-Dependent Expression of the Mitotic Activator Cdc25 Suggests a  
626 Mechanism of Size Control in Fission Yeast. *Curr. Biol.* **27**, 1491-1497.e4 (2017).
- 627 12. K. M. Schmoller, J. J. Turner, M. Kõivomägi, J. M. Skotheim, Dilution of the cell cycle inhibitor Whi5  
628 controls budding-yeast cell size. *Nature* **526**, 268–72 (2015).
- 629 13. J. B. Moseley, A. Mayeux, A. Paoletti, P. Nurse, A spatial gradient coordinates cell size and mitotic  
630 entry in fission yeast. *Nature* **459**, 857–860 (2009).
- 631 14. S. G. Martin, M. Berthelot-Grosjean, Polar gradients of the DYRK-family kinase Pom1 couple cell  
632 length with the cell cycle. *Nature* **459**, 852–856 (2009).
- 633 15. K. Z. Pan, T. E. Saunders, I. Flor-Parra, M. Howard, F. Chang, Cortical regulation of cell size by a sizer  
634 *cdr2p*. *Elife* **2014** (2014).
- 635 16. G. Facchetti, B. Knapp, I. Flor-Parra, F. Chang, M. Howard, Reprogramming Cdr2-Dependent  
636 Geometry-Based Cell Size Control in Fission Yeast. *Curr. Biol.* **29**, 350-358.e4 (2019).
- 637 17. J. O. Patterson, P. Rees, P. Nurse, Noisy Cell-Size-Correlated Expression of Cyclin B Drives  
638 Probabilistic Cell-Size Homeostasis in Fission Yeast. *Curr. Biol.* **29**, 1379-1386.e4 (2019).
- 639 18. N. Rhind, Cell Size Control via an Unstable Accumulating Activator and the Phenomenon of Excess  
640 Mitotic Delay (2017) <https://doi.org/10.1002/bies.201700184> (February 4, 2022).
- 641 19. M. D’Ario, *et al.*, Cell size controlled in plants using DNA content as an internal scale. *Science* (80-. ).  
642 **372**, 1176–1181 (2021).
- 643 20. D. O. Morgan, CYCLIN-DEPENDENT KINASES: Engines, Clocks, and Microprocessors. *Annu. Rev. Cell*  
644 *Dev. Biol.* **13**, 261–291 (2003).
- 645 21. D. U. Kim, *et al.*, Analysis of a genome-wide set of gene deletions in the fission yeast  
646 *Schizosaccharomyces pombe*. *Nat. Biotechnol.* **2010 286 28**, 617–623 (2010).
- 647 22. J. Hayles, *et al.*, A genome-wide resource of cell cycle and cell shape genes of fission yeast. *Open*  
648 *Biol.* **3**, 130053 (2013).
- 649 23. N. Moris, *et al.*, A genome-wide screen to identify genes controlling the rate of entry into mitosis in

- 650 fission yeast. *Cell Cycle* **15**, 3121–3130 (2016).
- 651 24. F. J. Navarro, P. Nurse, A systematic screen reveals new elements acting at the G2/M cell cycle  
652 control. *Genome Biol.* **13**, R36 (2012).
- 653 25. P. Russell, P. Nurse, cdc25+ functions as an inducer in the mitotic control of fission yeast. *Cell* **45**,  
654 145–153 (1986).
- 655 26. P. Nurse, Genetic control of cell size at cell division in yeast. *Nature* **256**, 547–551 (1975).
- 656 27. K. L. Gould, P. Nurse, Tyrosine phosphorylation of the fission yeast cdc2+ protein kinase regulates  
657 entry into mitosis. *Nat.* 1989 3426245 **342**, 39–45 (1989).
- 658 28. P. Russell, P. Nurse, Negative regulation of mitosis by wee1+, a gene encoding a protein kinase  
659 homolog. *Cell* **49**, 559–67 (1987).
- 660 29. J. M. Mitchison, P. Nurse, Growth in cell length in the fission yeast *Schizosaccharomyces pombe*. *J.*  
661 *Cell Sci.* **75**, 357–376 (1985).
- 662 30. N. C. Shaner, *et al.*, A bright monomeric green fluorescent protein derived from *Branchiostoma*  
663 *lanceolatum*. *Nat. Methods* **10**, 407–9 (2013).
- 664 31. H. Masuda, C. S. Fong, C. Ohtsuki, T. Haraguchi, Y. Hiraoka, Spatiotemporal regulations of Wee1 at  
665 the G2/M transition. *Mol. Biol. Cell* **22**, 555–569 (2011).
- 666 32. J. Kamenz, *et al.*, Robust Ordering of Anaphase Events by Adaptive Thresholds and Competing  
667 Degradation Pathways. *Mol. Cell* **60**, 446–59 (2015).
- 668 33. S. Moreno, P. Nurse, P. Russell, Regulation of mitosis by cyclic accumulation of p80cdc25 mitotic  
669 inducer in fission yeast. *Nature* **344**, 549–552 (1990).
- 670 34. N. Dietler, *et al.*, A convolutional neural network segments yeast microscopy images with high  
671 accuracy. *Nat. Commun.* **11** (2020).
- 672 35. F. R. Neumann, P. Nurse, Nuclear size control in fission yeast. *J. Cell Biol.* **179**, 593–600 (2007).
- 673 36. H. Cantwell, P. Nurse, A systematic genetic screen identifies essential factors involved in nuclear size  
674 control. *PLoS Genet.* **15**, e1007929 (2019).
- 675 37. H. Cantwell, P. Nurse, Unravelling nuclear size control. *Curr. Genet.* 2019 656 **65**, 1281–1285 (2019).

- 676 38. S. Berg, *et al.*, ilastik: interactive machine learning for (bio)image analysis. *Nat. Methods* **16**, 1226–  
677 1232 (2019).
- 678 39. A. Decottignies, P. Zarzov, P. Nurse, In vivo localisation of fission yeast cyclin-dependent kinase  
679 cdc2p and cyclin B cdc13p during mitosis and meiosis. *J. Cell Sci.* **114**, 2627–2640 (2001).
- 680 40. P. Fantes, P. Nurse, Control of cell size division in fission yeast by a growth-modulated size control  
681 over nuclear division. *Exp. Cell Res.* **107**, 377–386 (1977).
- 682 41. P. Nurse, P. Thuriaux, Controls over the timing of DNA replication during the cell cycle of fission  
683 yeast. *Exp. Cell Res.* **107**, 365–375 (1977).
- 684 42. S. Dorsey, *et al.*, G1/S Transcription Factor Copy Number Is a Growth-Dependent Determinant of  
685 Cell Cycle Commitment in Yeast. *Cell Syst.* **6**, 539-554.e11 (2018).
- 686 43. F. S. Heldt, R. Lunstone, J. J. Tyson, B. Novák, Dilution and titration of cell-cycle regulators may  
687 control cell size in budding yeast. *PLOS Comput. Biol.* **14**, e1006548 (2018).
- 688 44. I. M. Hagan, A. Grallert, Spatial control of mitotic commitment in fission yeast. *Biochem. Soc. Trans.*  
689 **41**, 1766–1771 (2013).
- 690 45. M. Jackman, C. Lindon, E. A. Nigg, J. Pines, Active cyclin B1–Cdk1 first appears on centrosomes in  
691 prophase. *Nat. Cell Biol.* **2003 52 5**, 143–148 (2003).
- 692 46. S. D. M. Santos, R. Wollman, T. Meyer, J. E. Ferrell, Spatial Positive Feedback at the Onset of Mitosis.  
693 *Cell* **149**, 1500–1513 (2012).
- 694 47. R. Aligue, L. Wu, P. Russell, Regulation of *Schizosaccharomyces pombe* Wee1 tyrosine kinase. *J. Biol.*  
695 *Chem.* **272**, 13320–13325 (1997).
- 696 48. S. Basu, J. O. Patterson, T. U. Zeisner, P. Nurse, A CDK activity buffer ensures mitotic completion.  
697 *Submitt. Publ.* (2022).
- 698 49. A. R. Araujo, *et al.*, Positive Feedback Keeps Duration of Mitosis Temporally Insulated from  
699 Upstream Cell-Cycle Events. *Mol. Cell* **64**, 362–375 (2016).
- 700 50. I. Hoffmann, P. R. Clarke, M. J. Marcote, E. Karsenti, G. Draetta, Phosphorylation and activation of  
701 human cdc25-C by cdc2–cyclin B and its involvement in the self-amplification of MPF at mitosis.

- 702 *EMBO J.* **12**, 53–63 (1993).
- 703 51. A. Kumagai, W. G. Dunphy, Regulation of the cdc25 protein during the cell cycle in *Xenopus* extracts.  
704 *Cell* **70**, 139–151 (1992).
- 705 52. M. J. Solomon, M. Glotzer, T. H. Lee, M. Philippe, M. W. Kirschner, Cyclin activation of p34cdc2. *Cell*  
706 **63**, 1013–1024 (1990).
- 707 53. S. Moreno, A. Klar, P. Nurse, Molecular genetic analysis of fission yeast *Schizosaccharomyces*  
708 *pombe*. *Methods Enzymol.* **194**, 795–823 (1991).
- 709 54. S. L. Forsburg, N. Rhind, Basic methods for fission yeast. *Yeast* **23**, 173–183 (2006).
- 710 55. J. Bähler, *et al.*, Heterologous modules for efficient and versatile PCR-based gene targeting in  
711 *Schizosaccharomyces pombe*. *Yeast* **14**, 943–51 (1998).
- 712 56. A. D. Edelstein, *et al.*, Advanced methods of microscope control using  $\mu$ Manager software. *J. Biol.*  
713 *Methods* **1**, e10 (2014).
- 714 57. J. Schindelin, *et al.*, Fiji: An open-source platform for biological-image analysis. *Nat. Methods* **9**, 676–  
715 682 (2012).
- 716 58. Z. Botev, Kernal density estimation  
717 (<https://www.mathworks.com/matlabcentral/fileexchange/17204-kernal-density-estimation>).  
718 *MATLAB Cent. File Exch.* (2022).
- 719

**Figure 1**

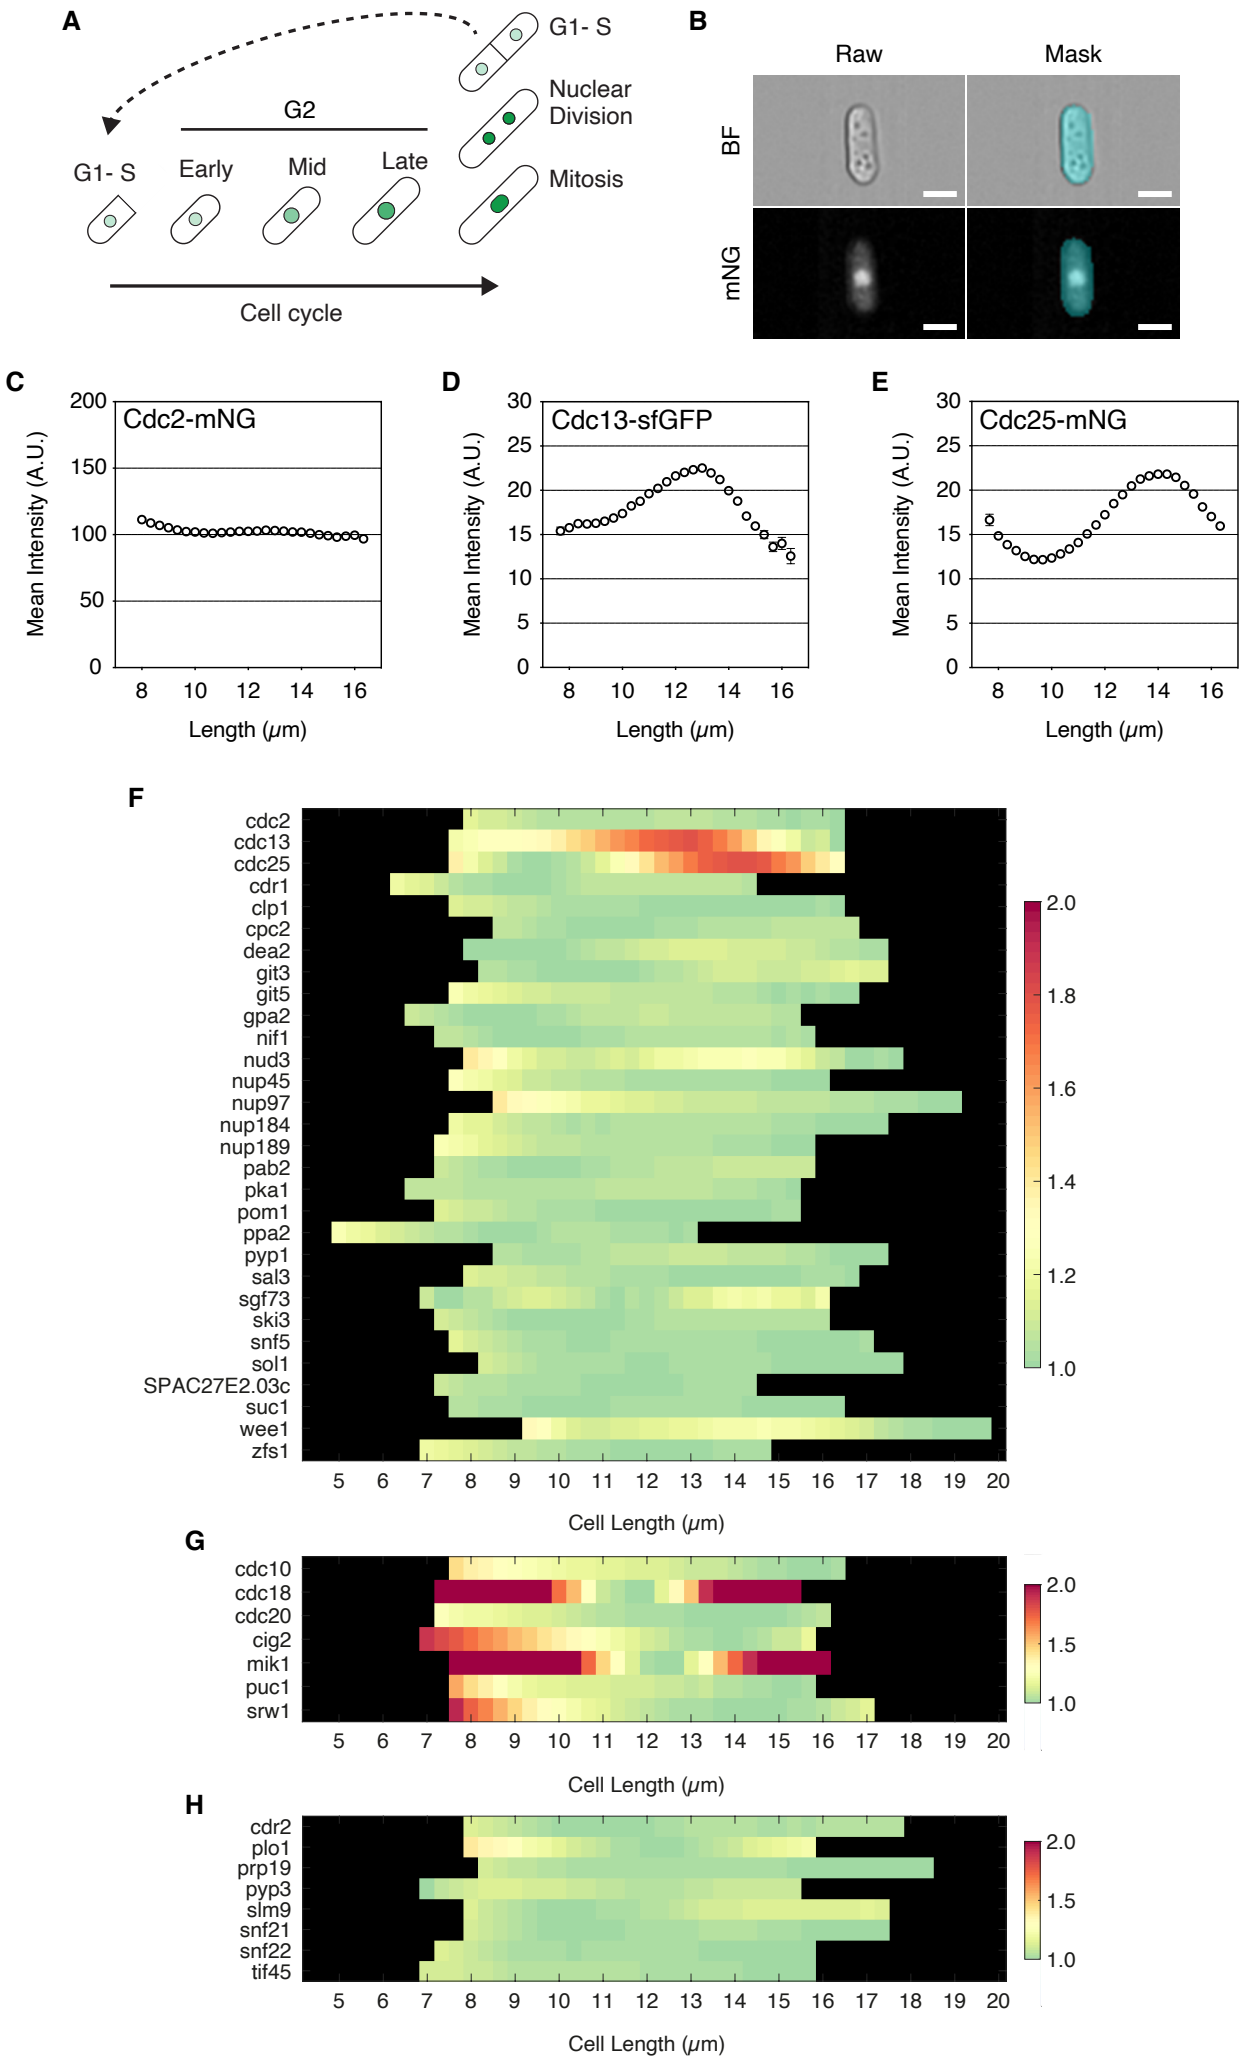

**Figure 2**

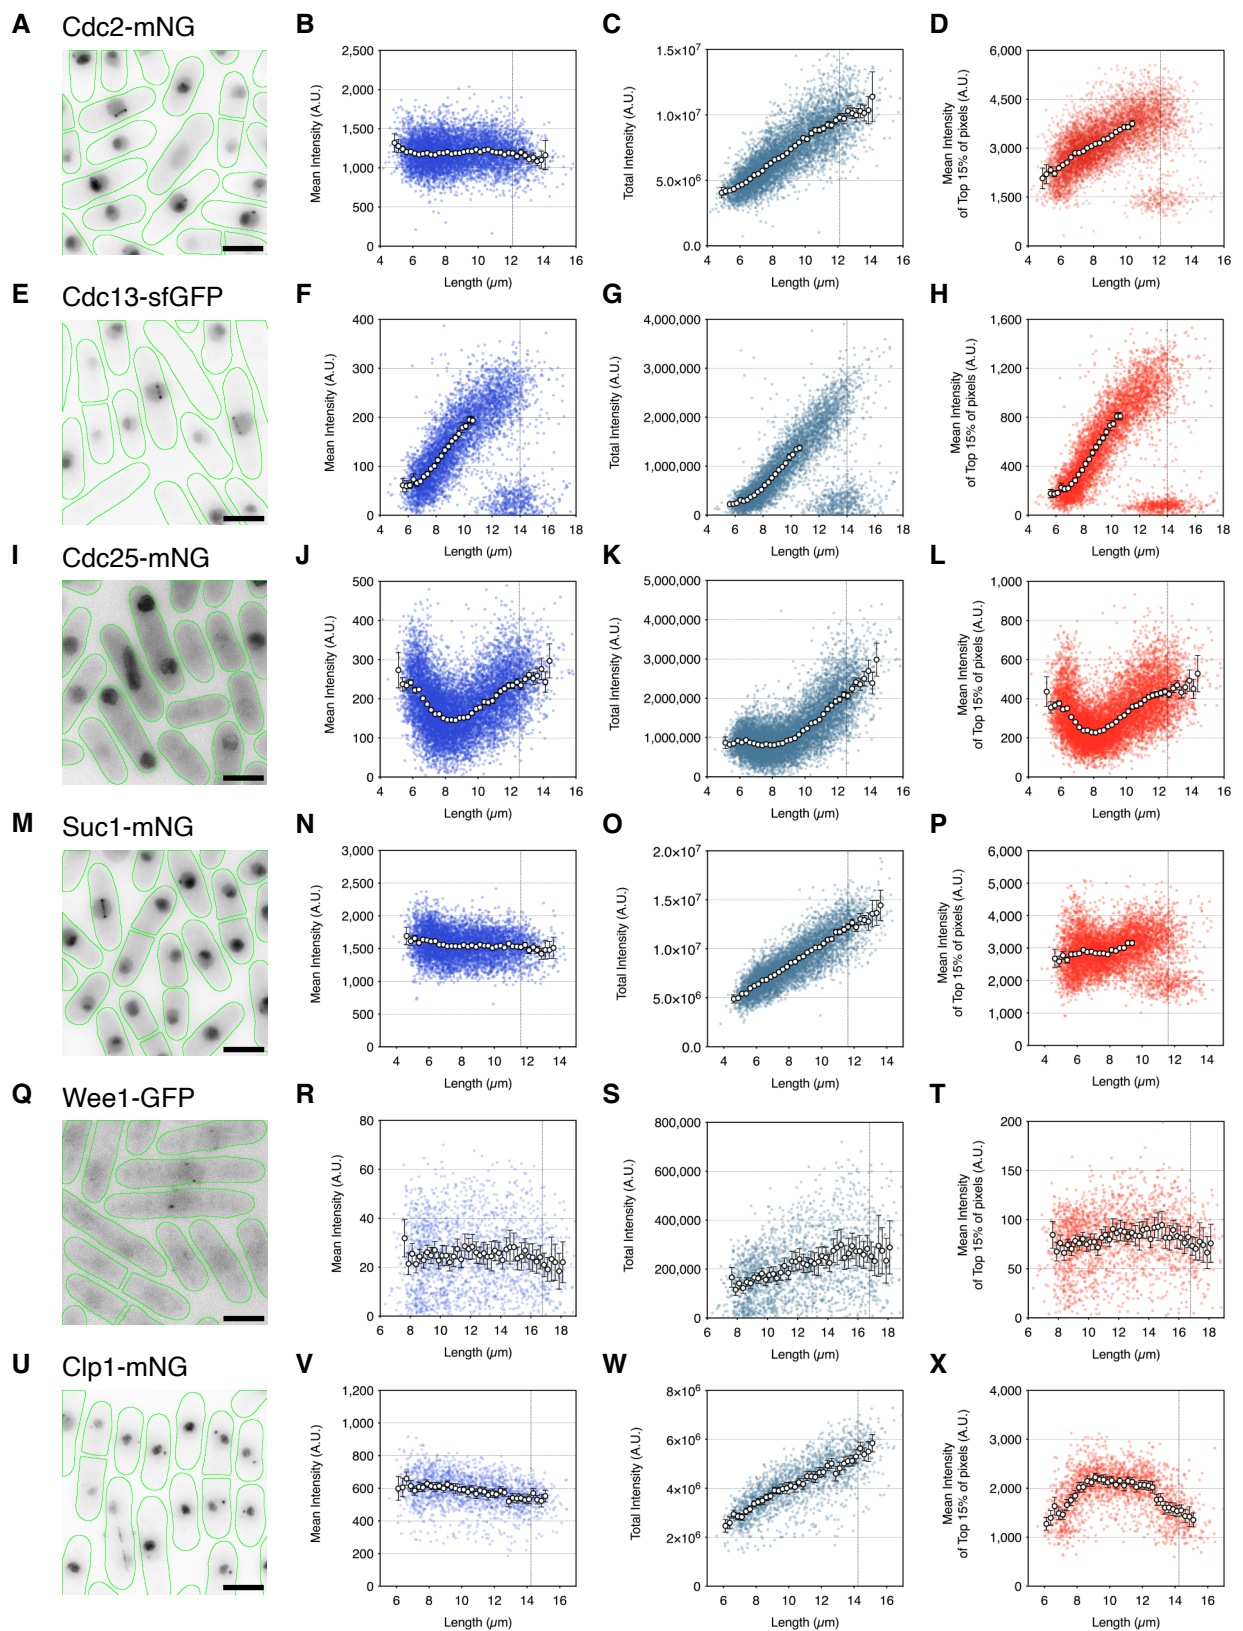

**Figure 3**

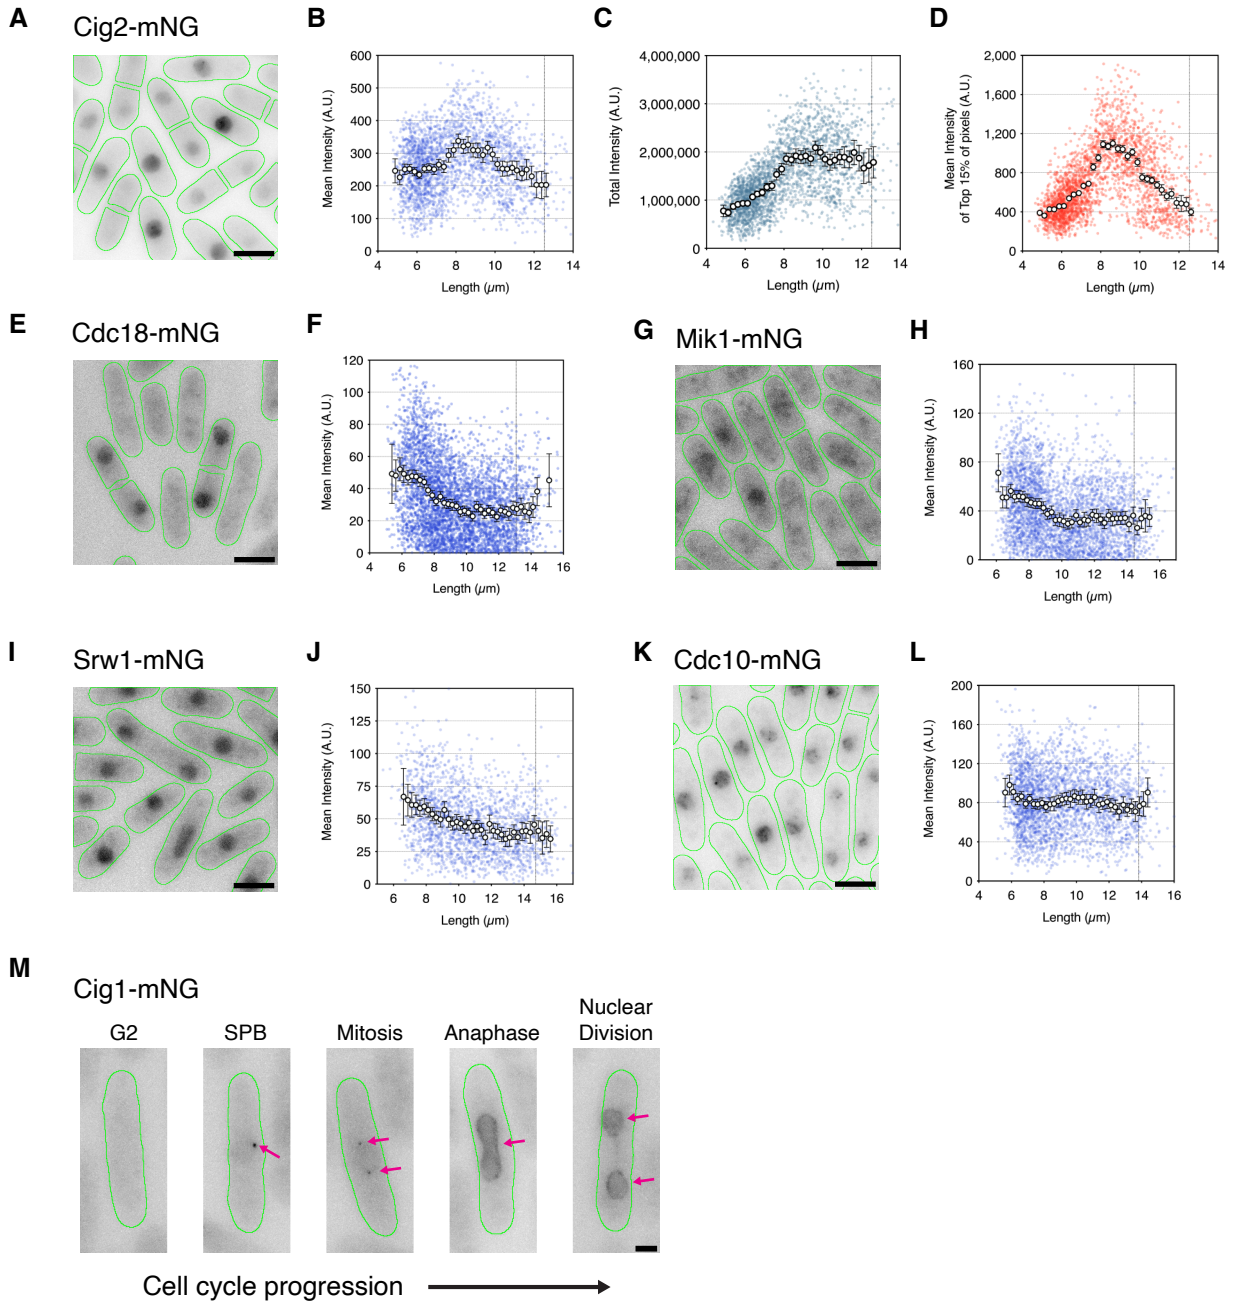



**Figure 4**

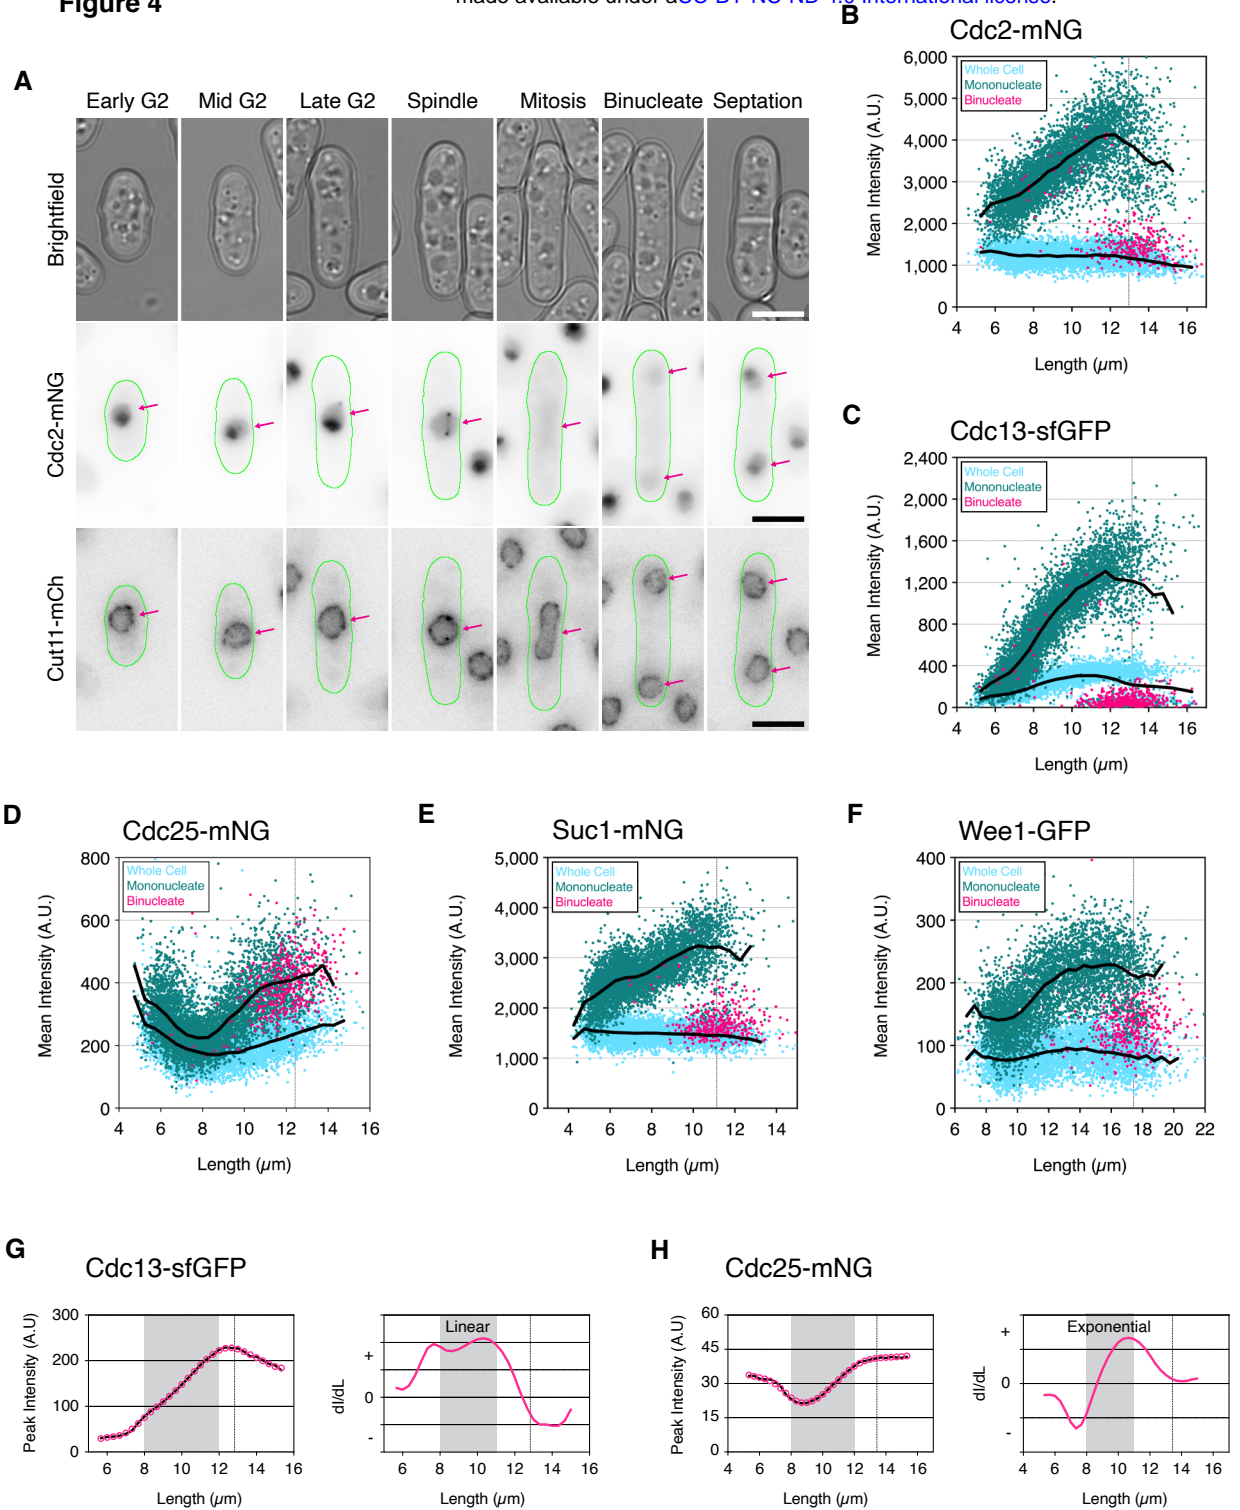

**Supplementary Figure 1**

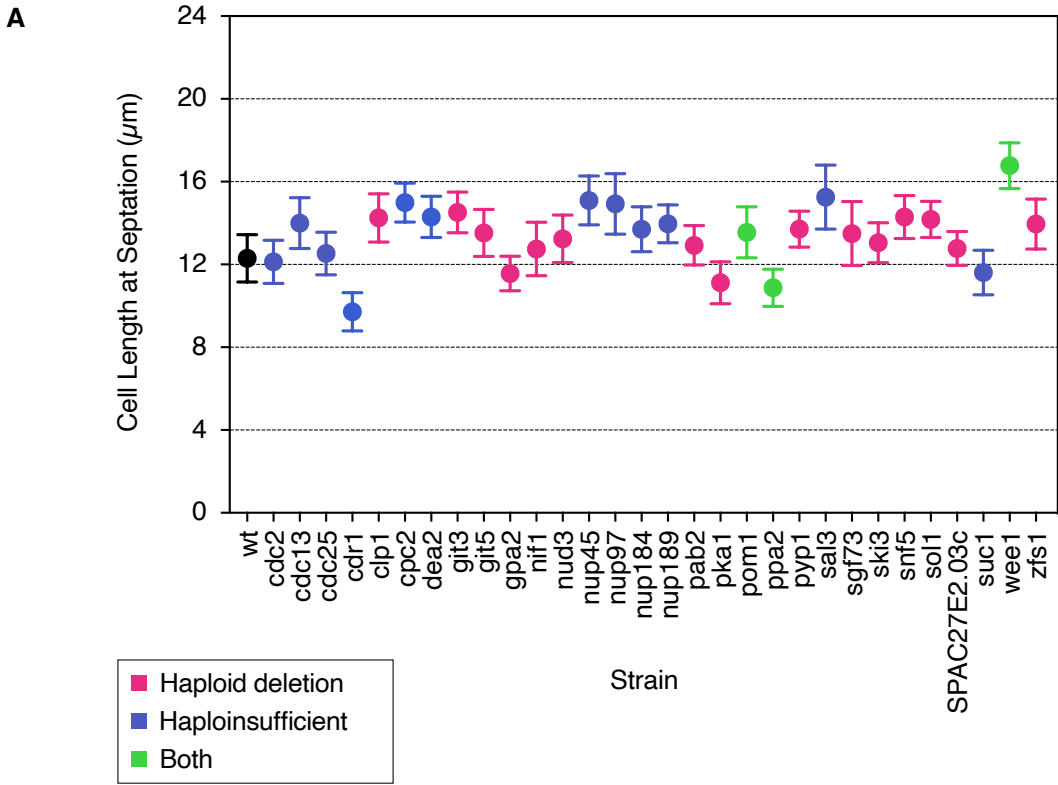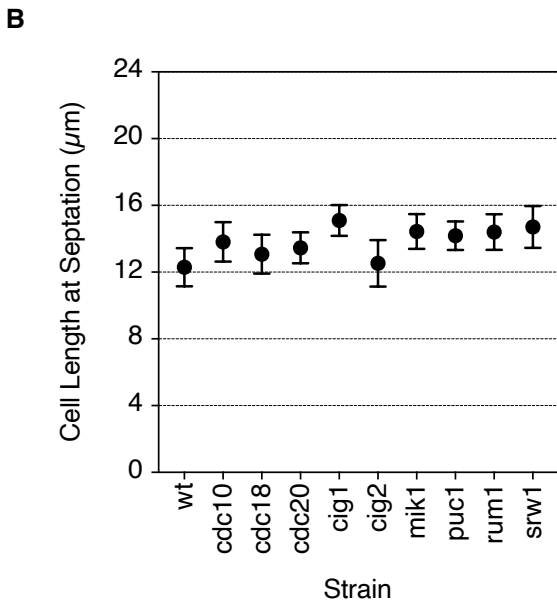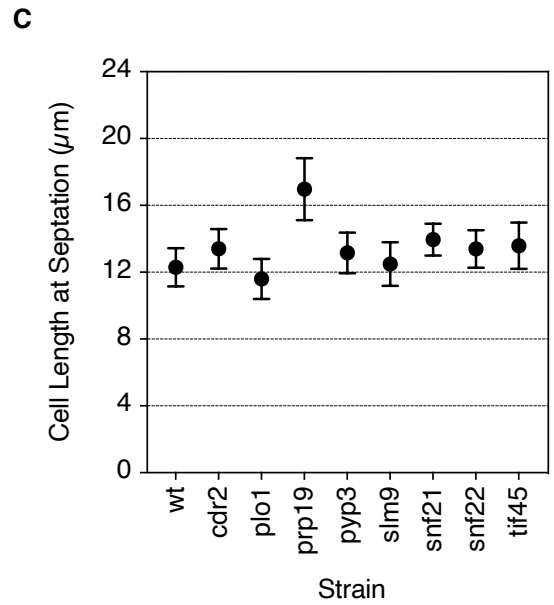

## Supplementary Figure 2

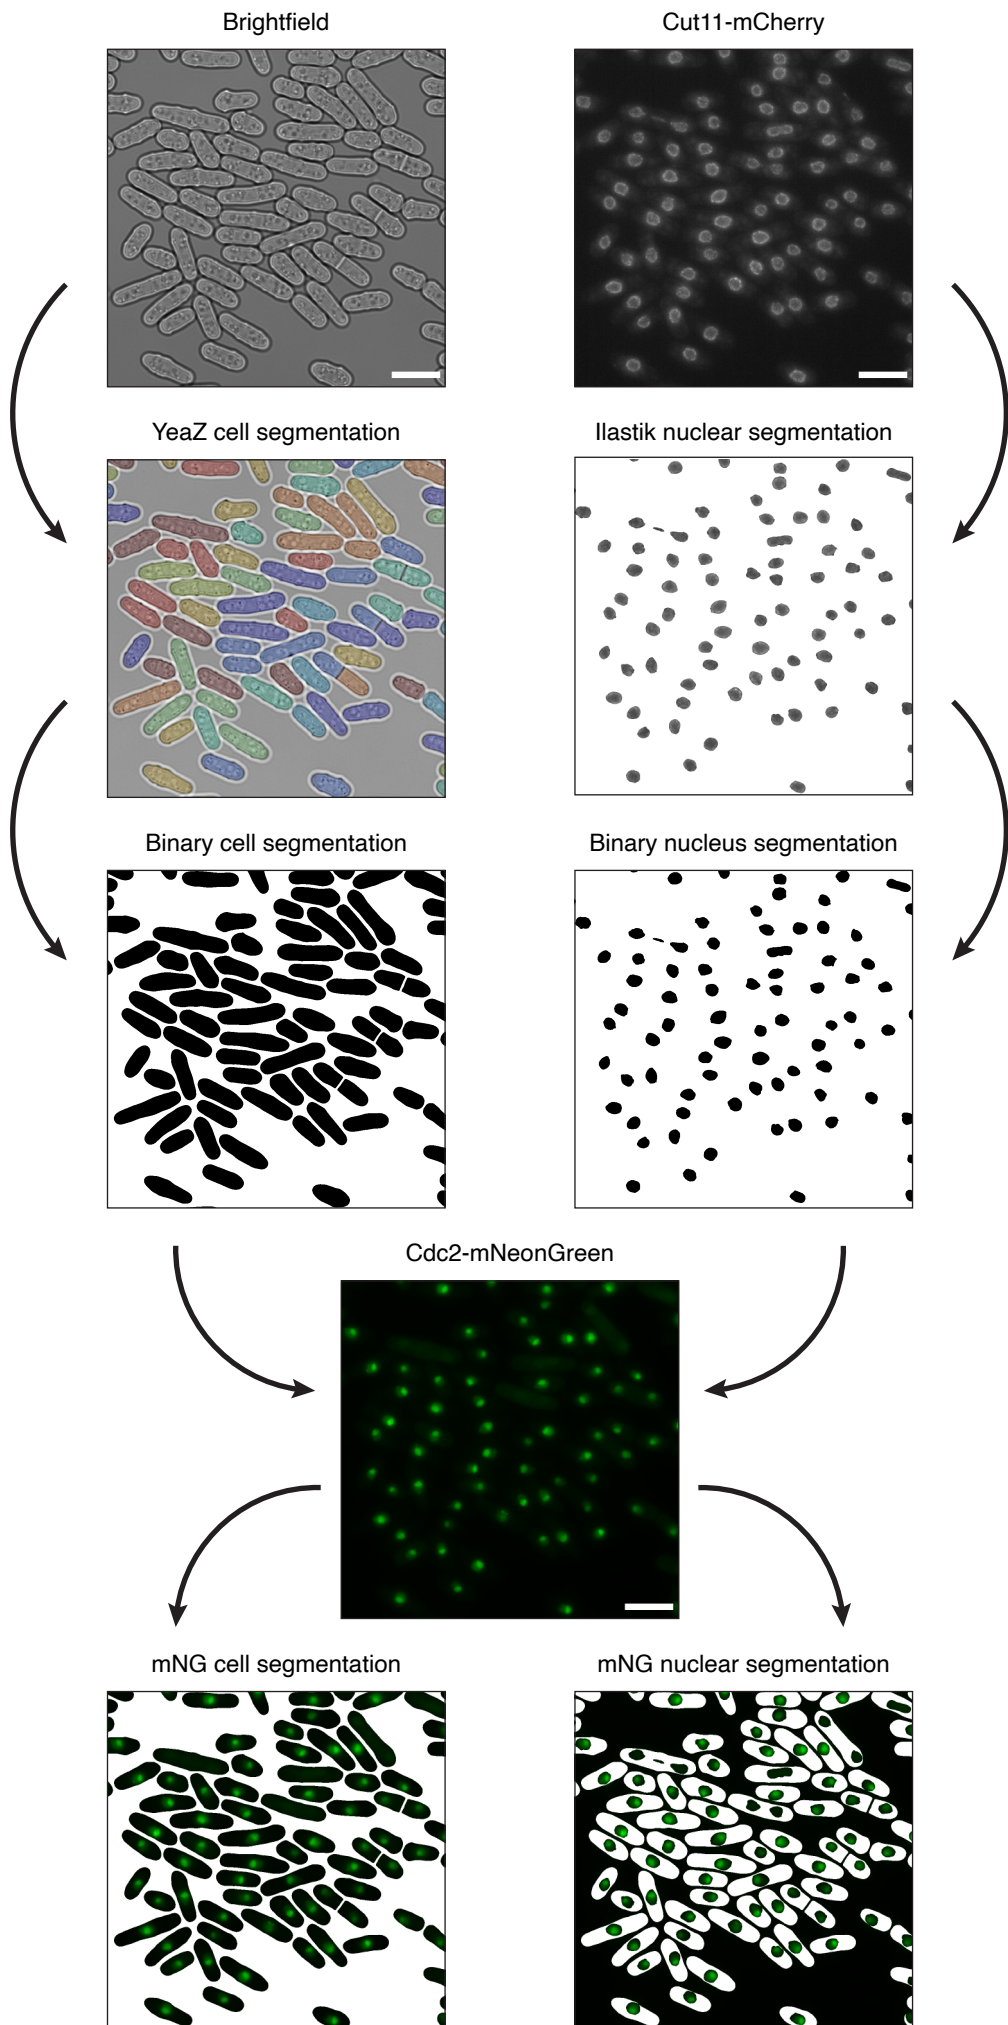

**Supplementary Figure 3**

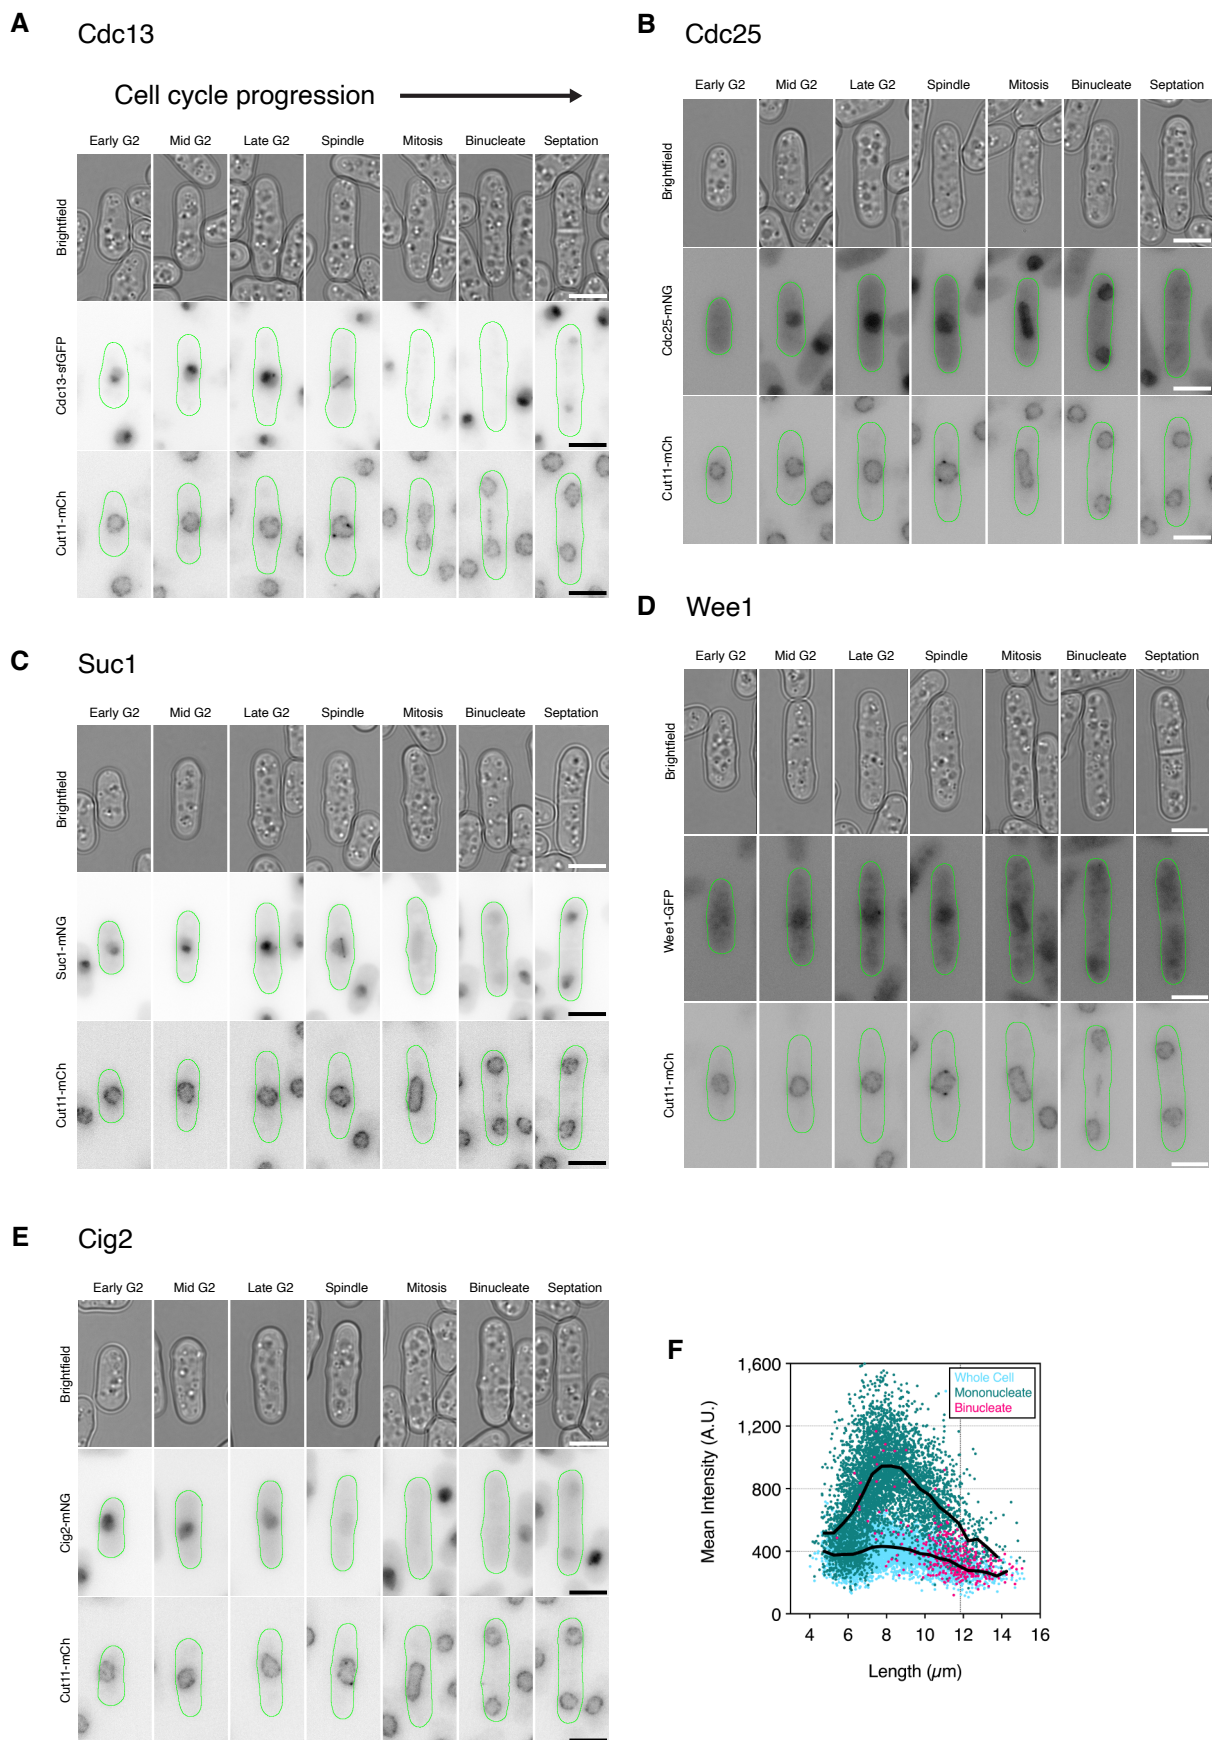

**Table S1. Complete list of *S. pombe* strains used in this study**

List of all the *Schizosaccharomyces pombe* strains used in this study along with their full genotypes, mating type, Nurse Lab stock number (PN...), S Curran stock number (SC...) and relevant source references and strain construction notes.

| Lab Stock number | SC Stock number | Genotype                                                            | MT | Source reference / Strain construction                                           |
|------------------|-----------------|---------------------------------------------------------------------|----|----------------------------------------------------------------------------------|
| PN1              | SC1             | 972                                                                 | h- | Lab stock                                                                        |
| PN5823           | SC116           | <i>cdc2-mNeonGreen:Kan</i>                                          | h- | This study, mNG transformed into PN1                                             |
| PN5883           | SC310           | <i>cdc13-sfGFP</i>                                                  | h- | Kamenz <i>et al.</i> , 2015                                                      |
| PN5822           | SC115           | <i>cdc25-mNeonGreen:Kan</i>                                         | h- | This study, <i>cdc25-mNeonGreen:Kan</i> transformed into PN1                     |
| PN5817           | SC109           | <i>cdr1-mNeonGreen:Kan</i>                                          | h- | This study, <i>cdc25-mNeonGreen:Kan</i> transformed into PN1                     |
| PN5864           | SC264           | <i>clp1-mNeonGreen:Kan</i>                                          | h- | This study, <i>clp1-mNeonGreen:Kan</i> transformed into PN1                      |
| PN5874           | SC284           | <i>cpc2-mNeonGreen:Kan</i>                                          | h- | This study, <i>cpc2-mNeonGreen:Kan</i> transformed into PN1                      |
| PN5872           | SC280           | <i>dea2-mNeonGreen:Kan</i>                                          | h- | This study, <i>dea2-mNeonGreen:Kan</i> transformed into PN1                      |
| PN5855           | SC244           | <i>git3-mNeonGreen:Kan</i>                                          | h- | This study, <i>git3-mNeonGreen:Kan</i> transformed into PN1                      |
| PN5856           | SC246           | <i>git5-mNeonGreen:Kan</i>                                          | h- | This study, <i>git5-mNeonGreen:Kan</i> transformed into PN1                      |
| PN5861           | SC258           | <i>gpa2-mNeonGreen:Kan</i>                                          | h- | This study, <i>gpa2-mNeonGreen:Kan</i> transformed into PN1                      |
| PN5867           | SC270           | <i>nif1-mNeonGreen:Kan</i>                                          | h- | This study, <i>nif1-mNeonGreen:Kan</i> transformed into PN1                      |
| PN5868           | SC272           | <i>nud3-mNeonGreen:Kan</i>                                          | h- | This study, <i>nud3-mNeonGreen:Kan</i> transformed into PN1                      |
| PN5859           | SC252           | <i>nup45-mNeonGreen:Kan</i>                                         | h- | This study, <i>nup45-mNeonGreen:Kan</i> transformed into PN1                     |
| PN5853           | SC240           | <i>nup97-mNeonGreen:Kan</i>                                         | h- | This study, <i>nup97-mNeonGreen:Kan</i> transformed into PN1                     |
| PN5882           | SC300           | <i>nup184-mNeonGreen:Kan</i>                                        | h- | This study, <i>nup184-mNeonGreen</i> transformed into PN1                        |
| PN5854           | SC242           | <i>nup189-mNeonGreen:Kan</i>                                        | h- | This study, <i>pab2-mNeonGreen:Kan</i> transformed into PN1                      |
| PN5871           | SC278           | <i>pab2-mNeonGreen:Kan</i>                                          | h- | This study, <i>pab2-mNeonGreen:Kan</i> transformed into PN1                      |
| PN5812           | SC69            | <i>pka1-GFP:Hph</i>                                                 | h- | This study, <i>pka1-GFP:Hph</i> transformed into PN1                             |
| PN5866           | SC268           | <i>pom1-mNeonGreen:Kan</i>                                          | h- | This study, <i>pom1-mNeonGreen:Kan</i> transformed into PN1                      |
| PN5862           | SC260           | <i>ppa2-mNeonGreen:Kan</i>                                          | h- | This study, <i>ppa2-mNeonGreen:Kan</i> transformed into PN1                      |
| PN5863           | SC262           | <i>pyp1-mNeonGreen:Kan</i>                                          | h- | This study, <i>pyp1-mNeonGreen:Kan</i> transformed into PN1                      |
| PN5873           | SC282           | <i>sal3-mNeonGreen:Kan</i>                                          | h- | This study, <i>sal3-mNeonGreen:Kan</i> transformed into PN1                      |
| PN5850           | SC234           | <i>sgf73-mNeonGreen:Kan</i>                                         | h- | This study, <i>sgf73-mNeonGreen:Kan</i> transformed into PN1                     |
| PN5851           | SC236           | <i>ski3-mNeonGreen:Kan</i>                                          | h- | This study, <i>ski3-mNeonGreen:Kan</i> transformed into PN1                      |
| PN5869           | SC274           | <i>snf5-mNeonGreen:Kan</i>                                          | h- | This study, <i>snf5-mNeonGreen:Kan</i> transformed into PN1                      |
| PN5870           | SC276           | <i>sol1-mNeonGreen:Kan</i>                                          | h- | This study, <i>sol1-mNeonGreen:Kan</i> transformed into PN1                      |
| PN5865           | SC266           | <i>SPAC27E2.03c-mNeonGreen:Kan</i>                                  | h- | This study, <i>SPAC27E2.03c-mNeonGreen:Kan</i> transformed into PN1              |
| PN5820           | SC112           | <i>suc1-mNeonGreen:Kan</i>                                          | h- | This study, <i>suc1-mNeonGreen:Kan</i> transformed into PN1                      |
| PN5841           | ER28            | <i>lys1+::wee1-GFP_ wee1Δ:ura4+_ura4-D18</i>                        | h- | Masuda <i>et al.</i> , 2011                                                      |
| PN5867           | SC248           | <i>zfs1-mNeonGreen:Kan</i>                                          | h- | This study, <i>zfs1-mNeonGreen:Kan</i> transformed into PN1                      |
| PN5813           | SC95            | <i>cdc10-mNeonGreen:Kan</i>                                         | h- | This study, <i>cdc10-mNeonGreen:Kan</i> transformed into PN1                     |
| PN5860           | SC254           | <i>cdc18-mNeonGreen:Kan</i>                                         | h- | This study, <i>cdc18-mNeonGreen:Kan</i> transformed into PN1                     |
| PN5826           | SC119           | <i>cdc20-mNeonGreen:Kan</i>                                         | h- | This study, <i>cdc20-mNeonGreen:Kan</i> transformed into PN1                     |
| PN5818           | SC110           | <i>cig2-mNeonGreen:Kan</i>                                          | h- | This study, <i>cig2-mNeonGreen:Kan</i> transformed into PN1                      |
| PN5825           | SC118           | <i>mik1-mNeonGreen:Kan</i>                                          | h- | This study, <i>mik1-mNeonGreen:Kan</i> transformed into PN1                      |
| PN5815           | SC99            | <i>puc1-mNeonGreen:Kan</i>                                          | h- | This study, <i>puc1-mNeonGreen:Kan</i> transformed into PN1                      |
| PN5819           | SC111           | <i>srw1-mNeonGreen:Kan</i>                                          | h- | This study, <i>srw1-mNeonGreen:Kan</i> transformed into PN1                      |
| PN5878           | SC292           | <i>cdr2-mNeonGreen:Kan</i>                                          | h- | This study, <i>cdr2-mNeonGreen:Kan</i> transformed into PN1                      |
| PN5877           | SC290           | <i>plo1-mNeonGreen:Kan</i>                                          | h- | This study, <i>plo1-mNeonGreen:Kan</i> transformed into PN1                      |
| PN5879           | SC294           | <i>prp19-mNeonGreen:Kan</i>                                         | h- | This study, <i>prp19-mNeonGreen:Kan</i> transformed into PN1                     |
| PN5816           | SC108           | <i>pyp3-mNeonGreen:Kan</i>                                          | h- | This study, <i>pyp3-mNeonGreen:Kan</i> transformed into PN1                      |
| PN5875           | SC286           | <i>slm9-mNeonGreen:Kan</i>                                          | h- | This study, <i>slm9-mNeonGreen:Kan</i> transformed into PN1                      |
| PN5880           | SC296           | <i>snf21-mNeonGreen:Kan</i>                                         | h- | This study, <i>snf21-mNeonGreen:Kan</i> transformed into PN1                     |
| PN5881           | SC298           | <i>snf22-mNeonGreen:Kan</i>                                         | h- | This study, <i>snf22-mNeonGreen:Kan</i> transformed into PN1                     |
| PN5876           | SC288           | <i>tif45-mNeonGreen:Kan</i>                                         | h- | This study, <i>tif45-mNeonGreen:Kan</i> transformed into PN1                     |
| PN5814           | SC96            | <i>cig1-mNeonGreen:Kan</i>                                          | h- | This study, <i>cig1-mNeonGreen:Kan</i> transformed into PN1                      |
| PN5821           | SC114           | <i>rum1-mNeonGreen:Kan</i>                                          | h- | This study, <i>rum1-mNeonGreen:Kan</i> transformed into PN1                      |
| PN5845           | SC347           | <i>cut11-mCherry:Nat</i>                                            | h- | Lab stock                                                                        |
| PN5886           | SC313           | <i>cdc2-mNeonGreen:Kan_cut11-mCherry:Nat</i>                        | h- | This study, SC116 x SC348 ( <i>cut11-mCherry:Nat</i> h+)                         |
| PN5899           | SC318           | <i>cdc13-sfGFP_cut11-mCherry:Nat</i>                                | h- | This study, SC310 x SC348 ( <i>cut11-mCherry:Nat</i> h+)                         |
| PN5888           | SC317           | <i>cdc25-mNeonGreen:Kan_cut11-mCherry:Nat</i>                       | h- | This study, SC115 x SC348 ( <i>cut11-mCherry:Nat</i> h+)                         |
| PN5895           | SC334           | <i>suc1-mNeonGreen:Kan_cut11-mCherry:Nat</i>                        | h- | This study, SC112 x SC348 ( <i>cut11-mCherry:Nat</i> h+)                         |
| PN5890           | SC319           | <i>lys1+::wee1-GFP-wee1_ wee1Δ:ura4+_cut11-mCherry:Nat_ura4-D18</i> | h- | This study, ER28 x HC121 ( <i>cut11-mCherry::Nat ura4-D18 leu1-32 ade- h+</i> )  |
| PN5899           | SC342           | <i>cig2-mNeonGreen:Kan_cut11-mCherry:Nat</i>                        | h- | This study, SC110 x SC348 ( <i>cut11-mCherry:Nat</i> h+)                         |
| PN5896           | SC335           | <i>cdc18-mNeonGreen:Kan_cut11-mCherry:Nat</i>                       | h- | This study, SC254 x HC121 ( <i>cut11-mCherry::Nat ura4-D18 leu1-32 ade- h+</i> ) |
| PN5887           | SC315           | <i>mik1-mNeonGreen:Kan_cut11-mCherry:Nat</i>                        | h- | This study, SC118 x HC121 ( <i>cut11-mCherry::Nat ura4-D18 leu1-32 ade- h+</i> ) |
| PN5885           | SC312           | <i>cig1-mNeonGreen:Kan_cut11-mCherry:Nat</i>                        | h- | This study, SC96 x HC121 ( <i>cut11-mCherry::Nat ura4-D18 leu1-32 ade- h+</i> )  |
| N/A              | SC333           | <i>rum1-mNeonGreen:Kan_cut11-mCherry:Nat</i>                        | h- | This study, SC114 x HC121 ( <i>cut11-mCherry::Nat ura4-D18 leu1-32 ade- h+</i> ) |

**Table S2. Primers used for C-terminal tagging of proteins analysed in this study**

List of all *Schizosaccharomyces pombe* genes fluorescently tagged in this study, with tagging primers for pFA6A C-terminal tagging of full length proteins and checking primers.

| Gene   | Pombase ID    | Screen | Tag   | Fw Tagging Primer (5'-3')                                                                                                  | Rv Tagging Primer (5'-3')                                                                                                  | Fw Checking Primer (5'-3')  | Rv Checking Primer (5'-3')  | Reference                   |
|--------|---------------|--------|-------|----------------------------------------------------------------------------------------------------------------------------|----------------------------------------------------------------------------------------------------------------------------|-----------------------------|-----------------------------|-----------------------------|
| cdc2   | SPBC11B10.09  | HI     | mNG   | TTGCCCAAAGTGTGTAGC<br>TTCCCAGACGTTAATGAT<br>TCTCCTACTGCCATGCATT<br>CCCTCTTACACTTGAAG<br>ATTTGATTCTGCTGGATCA<br>GCTGGC      | AACCTGATATCAAGAAACAC<br>AGCAAAGTACAGATAAAGT<br>CAAGGATAGCGTTTTTAA<br>GGTTTAATAAAGAGACG<br>AAAAGAATTCGAGCTCGTT<br>TAAAC     | CGTTGGATGTAT<br>TTTTGCTGAA  | TATGTTTTGAAC<br>AAACGCCAAG  |                             |
| cdc13  | SPBC582.03    | HI     | sfGFP | N/A                                                                                                                        | N/A                                                                                                                        | N/A                         | N/A                         | Kamenz <i>et al.</i> , 2015 |
| cdc25  | SPAC24H6.05   | HI     | mNG   | TTGCCCAAAGTGTGTAGC<br>TTCCCAGACGTTAATGAT<br>TCTCCTACTGCCATGCATT<br>CCCTCTTACACTTGAAG<br>ATTTGATTCTGCTGGATCA<br>GCTGGC      | AGAAAAAAGTGTGTAGC<br>AAAGTTGAATATAAAGAGT<br>ATACCTCAGGCTAGGTAAA<br>GTATTGAGTCAGCCTAAAA<br>TCAGAATTCGAGCTCGTT<br>TAAAC      | AAACCGTTGTGA<br>CCCAATTAAC  | GAGCAATTAGAA<br>TGGACTTCGG  |                             |
| cdr1   | SPAC644.06c   | HI     | mNG   | CTACTAATGCAAGATATACT<br>CCGAGAAAAGTTTCTCCG<br>GTTCTGTATTACGAAAGATT<br>TCTTATTCTTTGGGAAGG<br>ATGATTCTGCTGGATCAGC<br>TGGC    | ACATTTTGAATAGCCGCCA<br>CAGTATAGACATTAATGGT<br>TGATTTTGAGGAAAGAC<br>TGTGTTTTGAAAAAATCC<br>TATGAATTCGAGCTCGTTTA<br>AAC       | GCATCTTCTCTA<br>GCACCACTCT  | GTGTGCCCAAT<br>CATTAAACAGA  |                             |
| clp1   | SPAC1782.09c  | Hap    | mNG   | GTGTTAGCATGTCATCACT<br>TAACAATCTCTAATGGC<br>CGTGTGCTAAACCTAAGC<br>CTTCTAAAGCCGCTAAT<br>TTCTGATTCTGCTGGATCA<br>GCTGGC       | GACACAGTATAATCAAG<br>TTAGTTTATATGAAAAAAG<br>GAATGTA AAAACTGCCATT<br>TAAACCAGTAATTACAGGT<br>TTAGAATTCGAGCTCGTTTA<br>AAC     | ATCCAAAATGAG<br>AACAAAGCGT  | GCGCTAAATCA<br>GGGAATATTTG  |                             |
| cpc2   | SPAC6B12.15   | HI     | mNG   | CTCTTACCTGGTCTCCTGA<br>TGGCCAAACTTTGTTCTCT<br>GGCTGGACTGATAATCTCA<br>TTCGTGCTGGCAAGTTAC<br>CAAGGATTCTGCTGGATCA<br>GCTGGC   | ATTCAGAGTTTAAAGAAA<br>CGATGCACCCTAAAGCCAT<br>TCATCATTATCGCTTATGG<br>GACAAACAATTAATCTTAT<br>TTGAATTCGAGCTCGTTTAA<br>AC      | TACCTTGATGCT<br>TTGGGATCTT  | TGGTGTAAAG<br>GGATTTTTGC    |                             |
| dea2   | SPBC1198.02   | HI     | mNG   | CTGTCAAAAATGTGTTAA<br>GGAGTATACTGCTGAAATT<br>CAACAACCCAAAACCTTG<br>AAACAGCTGTGGAAGTTCA<br>AGCTGATTCTGCTGGATCA<br>GCTGGC    | AAATGAAGATAGTCTAAAG<br>AATATTTTAAAGAAATGAAA<br>AAGGAAAGAAATGAAACAA<br>ATACTCAATCACCACAAAT<br>TGGAAATTCGAGCTCGTTTA<br>AAC   | GGGTTTTTATTG<br>CTAATGCTGC  | TGCGTTTTTCGA<br>TAACAATGAC  |                             |
| git3   | SPCC1753.02c  | Hap    | mNG   | GAGATTTCGAGTAAAAGTTA<br>TTGGGATCAAATAAAGGAG<br>TTGACTTTAAAATGTTGGC<br>GGGGTAAATTTGGTGAGGA<br>AAAAGATTCTGCTGGATCA<br>GCTGGC | CGTCATAAAAAGAAATTTATA<br>ATACAAGAGAGGAGCTTGT<br>TGAGACTTCACCATAAACA<br>AAAATAAAAAGAACAAATC<br>CTTGAATTCGAGCTCGTTT<br>TAAAC | AATGATATGCAA<br>GATGATCCCC  | CATTCACTGGAT<br>GGCTTTAACA  |                             |
| git5   | SPBC32H8.07   | Hap    | mNG   | CTTTAGCTTTAAGTCTGAT<br>GGAACAATGTTGGCAACTG<br>GCTCTTGGGACGAATGTGT<br>TCGTCTCTGGTCTTCTGCA<br>GGGGATTCTGCTGGATCAG<br>CTGGC   | GTAATGTATAAGAAAAAAA<br>AACAAAAACAACATCATCAT<br>TTCCAAAGACAAAAAAA<br>AGGAGAAAAAAAATCATT<br>ATGAATTCGAGCTCGTTTA<br>AAC       | CCCGAAATAC<br>ATCGGATATTA   | AGCAGTCAACCT<br>CCTAGAATCG  |                             |
| gpa2   | SPAC23H3.13c  | Hap    | mNG   | ACACATCTACATAAAGGT<br>TGTCTTTCTGCCGTTAAG<br>GAAACAATCTACAACACA<br>GTCTGAAAGAAGCGGAAAT<br>GTTGATTCTGCTGGATCA<br>GCTGGC      | CTCTAGACATATGCGAGACA<br>GTAAGAGGCTCTCTGTTAA<br>CATATGAATAATGGTAGGG<br>TAAATTTATCTTCAAATTA<br>AAAGAATTCGAGCTCGTTT<br>TAAAC  | ATTTGTTTCGGA<br>AGAAACTGGA  | CAGACAAATCG<br>GTGATTTTCA   |                             |
| nif1   | SPBC23G7.04c  | Hap    | mNG   | ATTTAGAACTCACTCACTG<br>AAGTTTTCTACAAGCCAA<br>AAGCTAAATACGAAGTTT<br>GATTACTTCTGTAAGGTATT<br>TGGATTCTGCTGGATCAGC<br>TGGC     | ATTTGGGAAAATGCAAATA<br>AATGAATAGGACAAAAACA<br>AAAAAAAAGACAAAAAAA<br>ATGGTAAAAGAAATGAGAGG<br>GATTGAATTCGAGCTCGTT<br>TAAAC   | ATCGTTATCTGG<br>CTTTGCAATT  | TCGTGGAATCA<br>CTTTTTATCC   |                             |
| nud3   | SPBC19F8.02   | Hap    | mNG   | AACAAAAACGAAAAGATGT<br>ACTGCAAAATTCATGAAA<br>CAACATCCTGAAGTAGATT<br>TTTCAAATGTTAGAGACCA<br>GATTGATTCTGCTGGATCA<br>GCTGGC   | AAATTTCTACATTTTATCA<br>ATAGAGCTTAGAAAATTTT<br>GTAACAATTTGAATTAACA<br>TATATAAAATCATGAAACTA<br>TGAATTCGAGCTCGTTTAA<br>AC     | CTGTCGAAGAA<br>CAAGAAAAGGCT | AGAATGCCGATT<br>TGCTGTTTAT  |                             |
| nup45  | SPAC22G7.09c  | HI     | mNG   | TTAGTAATAGATTTGCTCAA<br>GTTACAGATGAAGTAAAGC<br>GTCTACAAGTGAACACTTC<br>AACGTCCTTGCCCTTTATAA<br>GTGATTCTGCTGGATCAGC<br>TGGC  | AATTTGCTACTTTAGAGAT<br>TTTTATCTATTTATTTTTT<br>ATGATGTTAAGGATTATGA<br>AGTCCCTTAAATGATCGCT<br>AGAAATTCGAGCTCGTTTAA<br>AAC    | TATGCTGCCACT<br>ATTGGTGAAC  | AGCACTACATG<br>GATGCAACAAG  |                             |
| nup97  | SPCC290.03c   | HI     | mNG   | TCATGTACAGTTTCTGATA<br>GAATATCGTATGCTTCTC<br>AAATCTTTGAACAGTTAAAT<br>CGCTGCGAAATGAAATGA<br>CAGATTCTGCTGGATCAGC<br>TGGC     | AATTAGGACTCAATGAATG<br>TATAGGCATAAAAAATGAT<br>GAAGTCAAGTAAACATAGA<br>ATAACAACCTTAAAAAAT<br>AAGAATTCGAGCTCGTTTA<br>AAC      | AATTTTACCCT<br>TGACCACTT    | AGAGAAAACAGC<br>CTCAGGAATTG |                             |
| nup184 | SPAP27G11.10c | HI     | mNG   | TGCAACAATTTAATCCCG<br>ATTACTACAAGAAATAGAC<br>TTGCTGAATTTGAAGATTGA<br>GATGCTGGAGGCATCGACT<br>ATTGATTCTGCTGGATCAG<br>CTGGC   | GTGAAAATTTGCTGCATT<br>GTGAAAATGCAGTAAATAT<br>CTTTTTAAAGAAATGACTTCA<br>GCAAATATTATCAAAACTAC<br>ATGAATTCGAGCTCGTTTA<br>AAC   | GGTGTGAACA<br>AATCGTTATGA   | GAAATTTGCTG<br>CATTGTGAAA   |                             |
| nup189 | SPAC1486.05   | HI     | mNG   | CACCTACGGATGCTATATG<br>TAATCTCCCTTACCACCTG                                                                                 | AACCTCAGAACATATATCC<br>GATTCATTAATATAGATT                                                                                  | TTAACGCGCTTT<br>GTAATGAAGA  | TTATGAATGATT<br>GCGCTTTAG   |                             |

| Gene         | Pombase ID   | Screen   | Tag | Fw Tagging Primer (5'-3')                                                                                                  | Rv Tagging Primer (5'-3')                                                                                                  | Fw Checking Primer (5'-3') | Rv Checking Primer (5'-3') | Reference                   |
|--------------|--------------|----------|-----|----------------------------------------------------------------------------------------------------------------------------|----------------------------------------------------------------------------------------------------------------------------|----------------------------|----------------------------|-----------------------------|
|              |              |          |     | CTGACAGCTAGCGAATTT<br>ACAAAAATATATCTGTGCAAT<br>TTGATTTCTGCTGGATCAGC<br>TGCC                                                | TTTTTTCTAATTCATCGTAT<br>AAACCAATCTAGAATACTAA<br>AGAATTCGAGCTCGTTTTAA<br>AC                                                 |                            |                            |                             |
| pab2         | SPBC16E9.12c | Hap      | mNG | GTCGTGGTGCGGGACGTG<br>GACGTGGAGGGGGTTCGTG<br>GCAGAGGAGGATATCGTG<br>GAAGAGCCCGTGGTTTTCCG<br>TCCGATGATTCTGCTGGA<br>TCAGCTGGC | TTTCCCACCTAACTGTTATT<br>GGTGACGATTTGAATGCCT<br>ATAATTCATTTTTCACTTTTT<br>CAAGTCATCAAAAGCGATTA<br>CGAATTCGAGCTCGTTTTAA<br>AC | GATGTTGCATGA<br>ACGACCTTTA | GCTGGCATTGTA<br>AACACAAAAA |                             |
| pka1         | SPBC106.10   | Hap      | GFP | AATTTGACGCTTATGCTGAT<br>GTAGCTACGGATTATGGAA<br>CATCTGAAGATCCTGAATTT<br>ACTTCTATCTTTAAGGACTT<br>TCGGATCCCCGGTTAATT<br>AA    | GCTCAACGCTTTAAGGC<br>TAGTACAATGAATCAATAA<br>GCATTCGAGTATCTTAAAA<br>CAAAACAAACGTGGCACA<br>AACAGAAATTCGAGCTCGTT<br>TAAAC     | ATATCCTTGAAG<br>GCAAGGTCAA | TGAAGAAGAAAT<br>GACTTGGGGT |                             |
| pom1         | SPAC2F7.03c  | HI & Hap | mNG | CCAAATCTTTTGACAAATTTA<br>GATTATTCAAATAATTCAGA<br>TAATGGTTTTTACGAAAGC<br>CGGTAGAGAAATCCCGC<br>CGGATTCGCTGGATCAGC<br>TGCC    | GTCAAAATAAAAAGAAAAA<br>AAGTTGATGACTTTGAAAC<br>GCAAGCAAAAGGTTTTCAA<br>CCTATTCCAAGGTAATGTG<br>TGAGAAATTCGAGCTCGTT<br>TAAAC   | AGAGCCCTCTAA<br>CCAAGCTTCT | AACTAGCATGGT<br>TGACACGTTG |                             |
| ppa2         | SPBC16H5.07c | HI & Hap | mNG | ATCAAGTCTTTTACAATTC<br>GATCCTGCCCCACGAGAA<br>GGCGAACCGTAATAGCTC<br>GAAGGACACCAGACTACTT<br>CCTTGATTCTGCTGGATCA<br>GCTGGC    | TTAACTCAAAAATCAGAAA<br>GGTGGATAAATTTTTGAAA<br>CAATCACAATCGATTGATC<br>ACTCATTAGAGAATTTGAAA<br>CTTGAATTCGAGCTCGTTT<br>TAAAC  | CCCATCAGCTA<br>GTTATGGAAGG | CAATGGCTTGA<br>GTGGAATACA  |                             |
| pyp1         | SPAC26F1.10c | Hap      | mNG | AAACCTTCACACAATTTAAA<br>TATGTGTATGACTGTATGC<br>ATTCTTTGCAAAAATCTCAA<br>GTTTCAATTTCCCGTTTTAAC<br>AGATTCGCTGGATCAGCT<br>GGC  | AGACACTTTACAAGTACAA<br>GAAATAAAGGAATCGATTA<br>AAACAGAAATATATTGTC<br>CAAGAAAAATCCAGTCAA<br>AATTGAATTCGAGCTCGTTT<br>TAAAC    | GATTCCTCAGAC<br>GTCGTTTTCC | ACGACCCTTC<br>GCTTAACTCT   |                             |
| sal3         | SPCC1840.03  | HI       | mNG | CTCGTTTTCCCTGCTGATCA<br>AGTTAATTCGTCTATTGGCA<br>CTTTGAGTGTGATATCA<br>GAGAGCTTTGTCTGCACAT<br>TTTGATTCTGCTGGATCAG<br>CTGGC   | CCTAACCTAACCTAACTA<br>ACTAAAGCATTTTGAGGAA<br>CCAAAGAAAAATTTGAAAG<br>ACTTAGAGTGAAGAAATG<br>AAATGAATTCGAGCTCGTT<br>TAAAC     | CAAATGCCAAC<br>GATTATTACGA | GCAATAAGTGAA<br>AACCTAGCCG |                             |
| sgf73        | SPCC126.04c  | Hap      | mNG | TTGCAGATGGTGGACGAG<br>GTATGCAAGTTACTGGTAC<br>TATATTGGGACGAGTGATT<br>CCTTTTAGTCCCGCCAAC<br>CACTAGATTCTGCTGGATC<br>AGCTGGC   | TGGTCAAGTAGACAAAAAT<br>GTAACATAATCTCATAAAA<br>GAATTTAAATCATCAACCG<br>AAGCAAAATCAAAAGAAAT<br>CTGAATTCGAGCTCGTTTAA<br>AAC    | TTGCAGCTGTC<br>AAAAGAAAAA  | GGGCTAAAGGA<br>TTGATTGTGAG |                             |
| ski3         | SPCC1919.05  | Hap      | mNG | ACTTGGTCCATGGGATTC<br>CGCAAATGGAAAGCTTTG<br>CATGGTGTACTCATGAGG<br>CACTAGTTTCAAGTATGC<br>TTCCGATTCGCTGGATCA<br>GCTGGC       | ATTTACAGGTTCCACAAC<br>ATTTCTAATCTGGTAGATA<br>TAGTTCGCTGGGTCATTA<br>AGTTGATAATAATACAAGT<br>TCGAATTCGAGCTCGTTTAA<br>AAC      | TGCTCATTGAA<br>GAAAGACGAA  | AAAAATGGCTCT<br>AGTAAGGGG  |                             |
| snf5         | SPAC2F7.08c  | Hap      | mNG | ATTTCCATATCCACTTGTG<br>TCAAGCTCGCATCAACAAA<br>AAAAGGAGGTGAGAAATGAA<br>TACGGTTTTGGATAGAAAT<br>ACTGATTCTGCTGGATCAG<br>CTGGC  | AGAAACTGGTCCGTCGAGC<br>TATCCATAACGTGAGTCAA<br>ATCTTGATTATGGTCTTTGA<br>TAAAGATTCTTCAAAAATG<br>TAGAATTCGAGCTCGTTTAA<br>AAC   | CTGCTGAAAG<br>ATGACTGTAGG  | CGAGAAACAAG<br>GAAAGACTGCT |                             |
| sol1         | SPBC30B4.04c | Hap      | mNG | TAAAAGAGATCTCAAATTTA<br>TTGGATCGAAGCTGGGACA<br>GTGATGCGCTTTTAGAAAA<br>TACGGATGATAAATCTGGC<br>ATTGATTCTGCTGGATCAG<br>CTGGC  | AGACAATATACATACAGAA<br>ACGCATCAGATTAAGTAGA<br>ATGAAGACAAAAATTTAAA<br>CGTTTGGAAAAATATCTACA<br>AAGAATTCGAGCTCGTTTAA<br>AAC   | ATATCTACGGTG<br>CGTCGACTTT | AATTGTTGCAAT<br>GCGTAGAATG |                             |
| SPAC27E2.03c | SPAC27E2.03c | Hap      | mNG | CTGCCGGTAAGTACCTTAC<br>CAAAGGAAAGAATATGTT<br>ATGGAGAGTGGTGACATTG<br>CTCATTGGAAAGGCTGGCAA<br>GCGAGATTCTGCTGGATCA<br>GCTGGC  | TAATACAATTTGCACTTTAT<br>AATATACTCTTTTCAATA<br>TTTTAAATCAAAAAAAA<br>AAAGCAATAGTAAGCATAA<br>TGAATTCGAGCTCGTTTTAA<br>AC       | AAGTTCGCTCT<br>GGACTATTCG  | ATATTGGCGGG<br>GTTCTTTAAT  |                             |
| suc1         | SPBC1734.14c | HI       | mNG | TCCATGTCACAGCCACA<br>CATCTGCTATTTAAGCGT<br>GAAAAAGATTATCAAATGA<br>AATTTAGTCAACACGGGG<br>TGGTATTCTGCTGGATCA<br>GCTGGC       | CCTAAAAAGTCAATATGTTT<br>CGCATCCATGAACTAATAT<br>TTTTTGTAAAGTAAACAA<br>GAAACGTTGGAGTTGACAA<br>ACGAATTCGAGCTCGTTTAA<br>AAC    | TTTGTTCCTCC<br>TAAACGAGA   | AGCAACATAAA<br>TGCGCAAGAT  |                             |
| wee1         | SPCC18B5.03  | HI       | GFP | N/A                                                                                                                        | N/A                                                                                                                        | N/A                        | N/A                        | Masuda <i>et al.</i> , 2011 |
| zfs1         | SPBC1718.07c | Hap      | mNG | ATTGCTCTACGAGTTGCG<br>ATGCTGCTTTTTGCATGAT<br>GAATCCAATGCTCAAAAAA<br>GTGCAACTATTAAGCAATC<br>TCCTGATTCTGCTGGATCA<br>GCTGGC   | TAAGCGTCATAATAAATTA<br>TCTCACCCAGATTGCATAA<br>CAACAAAGAACAAAAGTCA<br>TCTTATACAAGCTGATGTG<br>ATAGAATTCGAGCTCGTTT<br>TAAAC   | CTGGCAGTAGT<br>AATGGGGTAGC | ATGACTGGCAAA<br>CTCAACCTT  |                             |
| cdc10        | SPBC336.12c  |          | mNG | TGGAAAGTGACGGTCAACA<br>GGGAGAGTAGATATGGGT<br>CGAGTTGCTGGATTTTAC<br>GTGTTGTTAAAGAACATCA<br>AGCAGATTCTGCTGGATCA<br>GCTGGC    | GGTAGGATTCTATATTAAG<br>AAAAAAATTAAGTAGTTAA<br>TTATTCAGGACACTTTAGT<br>GGTAAACCAAAAAGCAA<br>TAGAATTCGAGCTCGTTTAA<br>AAC      | GAATTAGCGAAC<br>AAACTTTGGC | GTTAATGTCGTA<br>GAAGCCGAGC |                             |
| cdc18        | SPBC14C8.07c |          | mNG | TTAGTTTGTCTGTTCCAGAA<br>ATGGATGTCATTACAGCTG<br>TTGGAGCAATTTGGTACCTT<br>AAAACGATTTTTGACAGAA<br>GAGATTCTGCTGGATCAGC<br>TGCC  | TTCCGGCAAAATTTGAAAC<br>CGTAACGCGTGAATAAAA<br>ATATAATGAATGAAAAAAA<br>GAATGAGAAAGAAATGATA<br>GTAGAATTCGAGCTCGTTT<br>TAAAC    | GAGTGTGCGC<br>ATGTATTGAA   | GAGACCCAAA<br>ATTGAGAAGTG  |                             |
| cdc20        | SPBC25H2.13c |          | mNG | ACGTTTATCAATCTGTTGCT<br>GATTTTTACGAGTTTTCTAT<br>ATTGCAAAATCTGTTTCACT<br>CCATACCTTCTGTGCTGAA<br>CGATTCTGCTGGATCAGCT<br>GGC  | GCAGATAAAAATCAAAATA<br>CTTATAAAATACATATAAAG<br>ACAAAAAGCCAAACTCAT<br>GCTCATGCTGAGGCGAGA<br>AATGGAATTCGAGCTCGTT<br>TAAAC    | ATGTCATTAAA<br>GGAACGCTGT  | AGAGCATGAGT<br>GGAAAAATGGT |                             |
| cig1         | SPCC4E9.02   |          | mNG | ATGCCATTTACGAAAGTA<br>CTCGGAGAAATAGAATGAAG<br>CGAGTTAGCGCCTTTGCTC                                                          | ATCCGTAATAATAATATCG<br>TAGGCTTAATAATAGCAAA<br>CTAACTCAGAATATCATTGT                                                         | TTGTCTATGCAG<br>ATGTTGGGTC | CAGTAGTCCAA<br>GTCTCTGGGG  |                             |

| Gene  | Pombase ID   | Screen | Tag | Fw Tagging Primer (5'-3')                                                                                                  | Rv Tagging Primer (5'-3')                                                                                                 | Fw Checking Primer (5'-3')  | Rv Checking Primer (5'-3')  | Reference |
|-------|--------------|--------|-----|----------------------------------------------------------------------------------------------------------------------------|---------------------------------------------------------------------------------------------------------------------------|-----------------------------|-----------------------------|-----------|
| cig2  | SPAPB2B4.03  |        | mNG | GTCAACGACTACTCAGTCAA<br>TCGTACGGACGATGATGAC<br>CTTCAATCAGAACCGTCTT<br>CTTCTTTAAACAATGATGGT<br>CACGATTCTGCTGGATCAG<br>CTGGC | TATGATAATAAATAATAAAA<br>GAAGAGCTCAACCTCATAT<br>TCAACAGAATATTTGGCGTA<br>AGAAAATTTATAAGAGCGT<br>TCGGAATTCGAGCTCGTTT<br>AAAC | AAAGCTCTGGT<br>GGGTATGAAGA  | TTATCAAGGAGG<br>AAAGGCTTGA  |           |
| mik1  | SPBC660.14   |        | mNG | TGCCGGAATGATATTCAT<br>CTCTGAGCATTCTCAAAAA<br>GCTGC AATATCTACGAAG<br>ACCATAACAGTTGGTTAGA<br>AACTGATTCTGCTGGATCA<br>GCTGGC   | AAATACAAATTAATGAACCA<br>TGGAAAGACGCAAAATTC<br>TTCCCTCATTTGGGGGCTA<br>AAATATTCGCACACAGAAT<br>CCCCGAATTCGAGCTCGTTT<br>AAAC  | GGTGAGGTGTG<br>CTGAATCATT   | ATTGGGGTAAAC<br>ACAAGGTCAC  |           |
| puc1  | SPBC19F5.01c |        | mNG | TTTTGCAAAGAAATATCC<br>GGAACAATGCGCAATGGCT<br>GCCTGGTGCAACATGACTG<br>AAAAGGACTAGAGCGTAC<br>TTTGGATTCTGCTGGATCA<br>GCTGGC    | ATTTTGAAATATATCTCCA<br>TTACATGTTTGTCTAGAAGC<br>ATTGCAATATATATAAATCG<br>AAGAAGAAGCAATGTTAAA<br>GGAATTCGAGCTCGTTTAA<br>A    | ATCGTTTCTTTT<br>GACACACCCT  | ATATGAGCATAG<br>TTGCAAAACCG |           |
| rum1  | SPBC32F.09   |        | mNG | AAATGCGT1TTACCTGCGTA<br>TTCATCACCACAAAAATCA<br>CGATCTAATACAAAAGATG<br>AAAACAGGCACAATTTATTA<br>CGAGATTCTGCTGGATCAG<br>CTGGC | ATGAATAAGGCAGAAGAGT<br>ATTTCTGATTGGGCATTTA<br>TATAAACCGTATCAACAC<br>AATTACAAAATGCGAAAAA<br>AAGGAATTCGAGCTCGTTT<br>AAAC    | TTCAGGCTGG<br>AACTGATTTAT   | ATGCCGTAAAG<br>GTTGCTAAAA   |           |
| srw1  | SPAC144.13c  |        | mNG | TCTGGAAGCTGTTTGATTC<br>TAAATCAAAACACTCGCT<br>TCCACTATGAGTTCTCCATT<br>TGACCCTACAATGAAAAA<br>GATTCTGCTGGATCAGCTG<br>GC       | AAAGCGACAAAGGTGTAAT<br>ATTTTAGTAATAAGATGACA<br>AATATAATGTACAAAAGACT<br>TCAAAGAGTGAATGTGTTG<br>CAGAATTCGAGCTCGTTA<br>AAC   | TCTGGCTTCTGG<br>AGGAGGTA    | CTGTACATTGC<br>CAACAGAAA    |           |
| cdr2  | SPAC57A10.02 |        | mNG | CGGCATCCAGACCTGTTTC<br>TCGAATGAGTGAAGTAGT<br>AGTCCCTTTTCTGATTTTCG<br>TCAACGCAATCCGTCCAA<br>AGTGATTCTGCTGGATCAG<br>CTGGC    | CCAAAGCATCAGGAGAAAA<br>ATGAAGTTTGCAGAAAGTTT<br>GGAGAAATCAAAAAAATG<br>ATAATAATAATAAAAAAGA<br>ATGAATTCGAGCTCGTTA<br>AAC     | CTGTGAGTGCCT<br>CGATATCTGC  | ACATGTAGCAG<br>AGCAGCAAAA   |           |
| plo1  | SP23C11.16   |        | mNG | CATTTTCAGAAAGCTTGAG<br>ATCTCGCTTAAAGTATATTC<br>GCAGAGCTTGGAAATCGT<br>GGGCGTCGAAAATGGAAG<br>TGAGTGATTCTGCTGGATC<br>AGCTGG   | TAGTACAAAATGAGGATG<br>TGAAATATGGAAAAATAGA<br>CAGCATAGTAACCTAACGC<br>CCAAGTATAGATTAACGGT<br>ATTAGAATTCGAGCTCGTTT<br>AAAC   | CGCACGGAAGA<br>TCATTGTATTA  | GTCCCTTAAGA<br>CAGAATTTGC   |           |
| prp19 | SPAC29A4.08c |        | mNG | CTATTTCTAATTTGGTTTGG<br>TTAAATGAGTTACACCGATT<br>GTTGTTTACTACTCAAATG<br>GAGCCATTCTCCGTTGGG<br>TGATTCTGCTGGATCAGCT<br>GGC    | ACTTAAGTTAAAGAGCCAA<br>AATCTTACTAAATACGAAAA<br>GCCTAATGGAGGAGCACAT<br>AATTAAGGATTAAAAAATTG<br>GGGAATTCGAGCTCGTTA<br>AAC   | ATTTGGTGAAGA<br>CGGTTATTGG  | CGAGCCTGATC<br>TTGAGAAAGTT  |           |
| pyp3  | SPAC11E3.09  |        | mNG | AATCGGTCGATCAGCTTGT<br>TTTTCTTTATACAGTATCTC<br>AAGAGCTGCTTCAAGGGAA<br>GGAATTTCTTCTCCTCAGT<br>TAGATTCTGCTGGATCAGC<br>TGGC   | AATAATATAATGTTAATTCG<br>AAAATTCATGAGACGAGTT<br>TTTAACATCGAATCGACTAT<br>CAGCAAACTCTAAACCAAA<br>GGGAATTCGAGCTCGTTA<br>AAC   | TAGTTTCCAGTC<br>TTCGGTCAACA | TGAATCACAAG<br>GATGAAGTGC   |           |
| slm9  | SPBC15D4.03  |        | mNG | TAATTCATACAGCAAATAC<br>CGAGATATGCAACGAATTA<br>CTTCTCAATATCTGACTTA<br>TTACGACGATCTGCACCTTT<br>AGATTCTGCTGGATCAGCT<br>GGC    | GAGATGTTTGTATATAT<br>GTTTACGTTTTAATTTAAAT<br>TAGTTATACAATCTGTTCTG<br>AGCAGAAGTAGTTGCAGCA<br>AGAATTCGAGCTCGTTTAA<br>AC     | CAAGTAGGAA<br>ATCGACTTTGG   | TATGCGGTAGAT<br>GTCACCGAAC  |           |
| snf21 | SPAC1250.01  |        | mNG | AGGATGGCATTAGCAAC<br>GCTTCGCGGAATGGAGGC<br>GGAGGCTACATCGCAATTG<br>GAAGACAGAATTGAAATG<br>AGGCTGATTCTGCTGGATC<br>AGCTGGC     | AAAAAAACAAAAAAGAC<br>AATCTGTGTTTTATGAGAC<br>TTCAGCACITGACTTATA<br>GTAGTTCAAAAAAAGCAAT<br>TAAGAATTCGAGCTCGTTT<br>AAAC      | CGCACTTGATG<br>CAATTAGAAAG  | ATCATCTGAGCT<br>AGTGTGGCCA  |           |
| snf22 | SPCC1620.14c |        | mNG | TACCGTTGGATTCTGGTAT<br>AGTAAGCCCGAAGATGAC<br>AAAGTTATTACTTATGAAGA<br>TTCTTCTTCTTATTTCGG<br>AGGATTCTGCTGGATCAGC<br>TGGC     | ATAGTCCTCACCTAACAAA<br>ATGACCAAAATATTATAAA<br>CAAGGCATTAATAAAAC<br>GACAAAAGGTAAGCGTTA<br>GTCGAATTCGAGCTCGTTT<br>AAAC      | CAATTGTTTACG<br>AGGATGCAAAA | AGGCAGCTCTA<br>CATACGACTCC  |           |
| tif45 | SPAC16E8.15  |        | mNG | GATCGGAACTATAGAATT<br>TAGCGCTCATGAAGATTCT<br>TCCAAGTCTGGTAGCACTC<br>CGCCAAAACCTCGCATGAG<br>TGTGATTCTGCTGGATCA<br>GCTGGC    | CAATTATAAGCAAATAGCT<br>ATGCAGCATGGACCTTTTA<br>AACTCCAAGTTATTTTGT<br>AACAAAAGAGCGTTTTTATC<br>ATGAATTCGAGCTCGTTA<br>AAC     | TGCGTAAGGAT<br>TTTACCCTCT   | TTCGAAAATAT<br>CCACCCATTTC  |           |
